# Supplementary material for: Relación literaria, tecnoloxía e cultura única
Source: Royal Society of Chemistry journal article supplement (doi:10.1039/d3sm00005b), 2003-01-01
Supplement: d3sm00005b1.pdf [file d3sm00005b1.pdf]

Supporting Information

**The application of the hierarchical approach for the construction of  
foldameric peptide self-assembled nanostructures**

Monika Szefczyk, Natalia Szulc, Marlena Gąsior-Głogowska, Dominika Bystranowska, Andrzej Żak,

Andrzej Sikora, Oliwia Polańska, Andrzej Ożyhar, Łukasz Berlicki

| <b>Content</b>                                                                                                      | <b>Page Number</b> |
|---------------------------------------------------------------------------------------------------------------------|--------------------|
| <b>Table S1</b> Peptides analytical data.                                                                           | S2                 |
| <b>Fig. S2</b> Mass spectra.                                                                                        | S3                 |
| <b>Fig. S3</b> Analytical HPLC chromatograms.                                                                       | S7                 |
| <b>Eqn. S4.</b> Mean residue ellipticity calculation.                                                               | S11                |
| <b>Eqn. S5.</b> The thermal denaturation experiment data fitting.                                                   | S12                |
| <b>Fig. S6</b> Sedimentation coefficient distributions $c(s)$ obtained for different concentrations.                | S13                |
| <b>Fig. S7</b> Raw ATR-FTIR spectra on the day of dissolving.                                                       | S14                |
| <b>Fig. S8</b> Raw ATR-FTIR spectra after 30 days of incubation at 37 °C.                                           | S15                |
| <b>Fig. S9</b> Normalized ATR-FTIR spectra of air-dried films registered on the day of dissolving.                  | S16                |
| <b>Fig. S10</b> Normalized ATR-FTIR spectra of air-dried films registered after 30 days of incubation at 37 °C.     | S17                |
| <b>Fig. S11</b> Raw FT-Raman spectra.                                                                               | S19                |
| <b>Fig. S12</b> Normalized FT-Raman spectra.                                                                        | S20                |
| <b>Fig. S13</b> The comparison of the normalized ATR-FTIR spectra after dissolving and after 30 days of incubation. | S21                |
| <b>Fig. S14</b> Frequency distributions of the peptides height observed by AFM.                                     | S22                |
| <b>Fig. S15</b> Electron micrographs with size measurements after 30 days of incubation at 37 °C.                   | S23                |
| <b>Fig. S16</b> The studied peptides stained with Congo red and examined under crossed polarized light.             | S24                |
| <b>Fig. S17</b> Results of ThT fluorescence kinetic assay.                                                          | S26                |
| <b>Table S18</b> The mean values of relative fluorescence in the time range of 5 to 12.                             | S26                |

**Table S1** Peptides analytical data.

| <b>Name</b> | <b>Formula</b>                                                    | <b>Calculated M/z</b>                       | <b>Experimental M/z</b>                     | <b>Analytical HPLC t<sub>r</sub> [min]</b> |
|-------------|-------------------------------------------------------------------|---------------------------------------------|---------------------------------------------|--------------------------------------------|
| <b>1</b>    | C <sub>130</sub> H <sub>203</sub> N <sub>33</sub> O <sub>37</sub> | [(M+2H)/2] 1410.7693<br>[(M+3H)/3] 940.8431 | [(M+2H)/2] 1410.7601<br>[(M+3H)/3] 940.8427 | 16.467                                     |
| <b>1_b</b>  | C <sub>139</sub> H <sub>215</sub> N <sub>33</sub> O <sub>37</sub> | [(M+2H)/2] 1470.8071<br>[(M+3H)/3] 980.8740 | [(M+2H)/2] 1470.8396<br>[(M+3H)/3] 980.8728 | 16.733                                     |
| <b>1_c</b>  | C <sub>139</sub> H <sub>215</sub> N <sub>33</sub> O <sub>37</sub> | [(M+2H)/2] 1470.8071<br>[(M+3H)/3] 980.8740 | [(M+2H)/2] 1470.7970<br>[(M+3H)/3] 980.8748 | 17.933                                     |
| <b>1_f</b>  | C <sub>135</sub> H <sub>209</sub> N <sub>31</sub> O <sub>35</sub> | [(M+2H)/2] 1413.7856<br>[(M+3H)/3] 942.8597 | [(M+2H)/2] 1413.7716<br>[(M+3H)/3] 942.8586 | 17.900                                     |
| <b>2</b>    | C <sub>119</sub> H <sub>198</sub> N <sub>32</sub> O <sub>34</sub> | [(M+3H)/3] 874.5004<br>[(M+4H)/4] 656.3780  | [(M+3H)/3] 874.4998<br>[(M+4H)/4] 656.3998  | 17.473                                     |
| <b>2_b</b>  | C <sub>128</sub> H <sub>210</sub> N <sub>32</sub> O <sub>34</sub> | [(M+2H)/2] 1371.2937<br>[(M+3H)/3] 914.5317 | [(M+2H)/2] 1371.2964<br>[(M+3H)/3] 914.5308 | 17.053                                     |
| <b>2_c</b>  | C <sub>128</sub> H <sub>210</sub> N <sub>32</sub> O <sub>34</sub> | [(M+2H)/2] 1371.2937<br>[(M+3H)/3] 914.5317 | [(M+2H)/2] 1371.2887<br>[(M+3H)/3] 914.5313 | 17.173                                     |
| <b>2_f</b>  | C <sub>124</sub> H <sub>204</sub> N <sub>30</sub> O <sub>32</sub> | [(M+2H)/2] 1314.2722<br>[(M+3H)/3] 876.5174 | [(M+2H)/2] 1314.2855<br>[(M+3H)/3] 876.5172 | 17.440                                     |

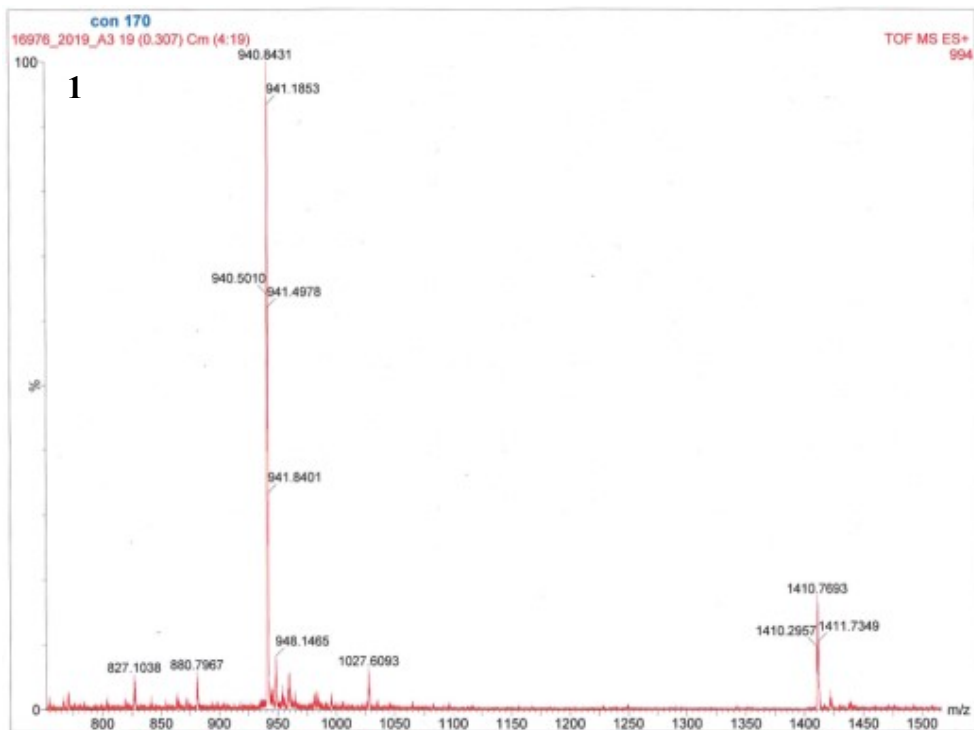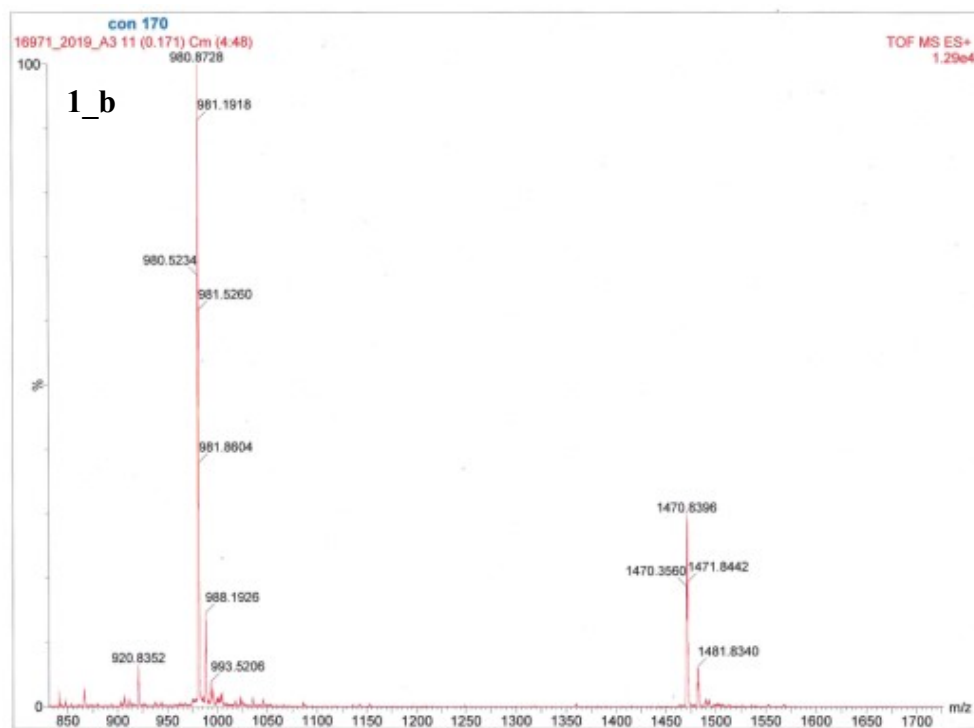

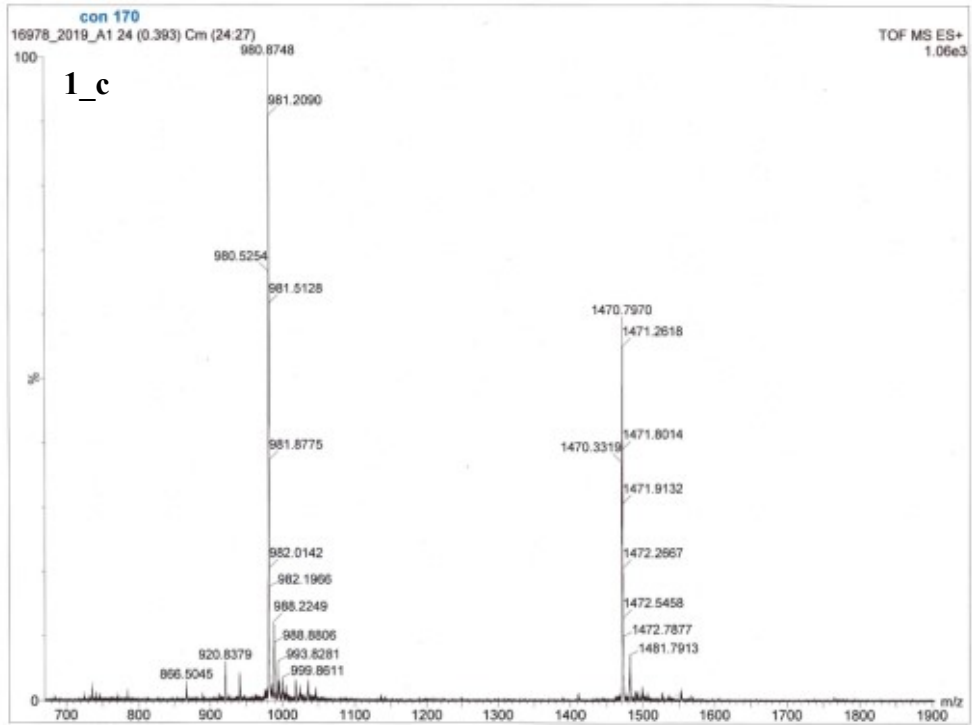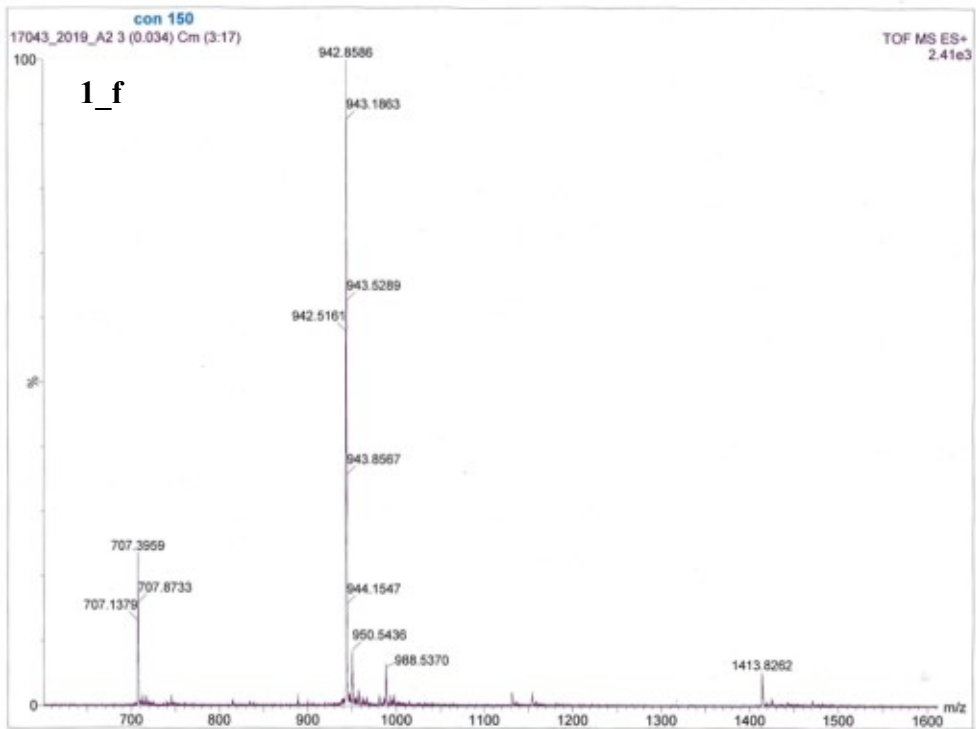

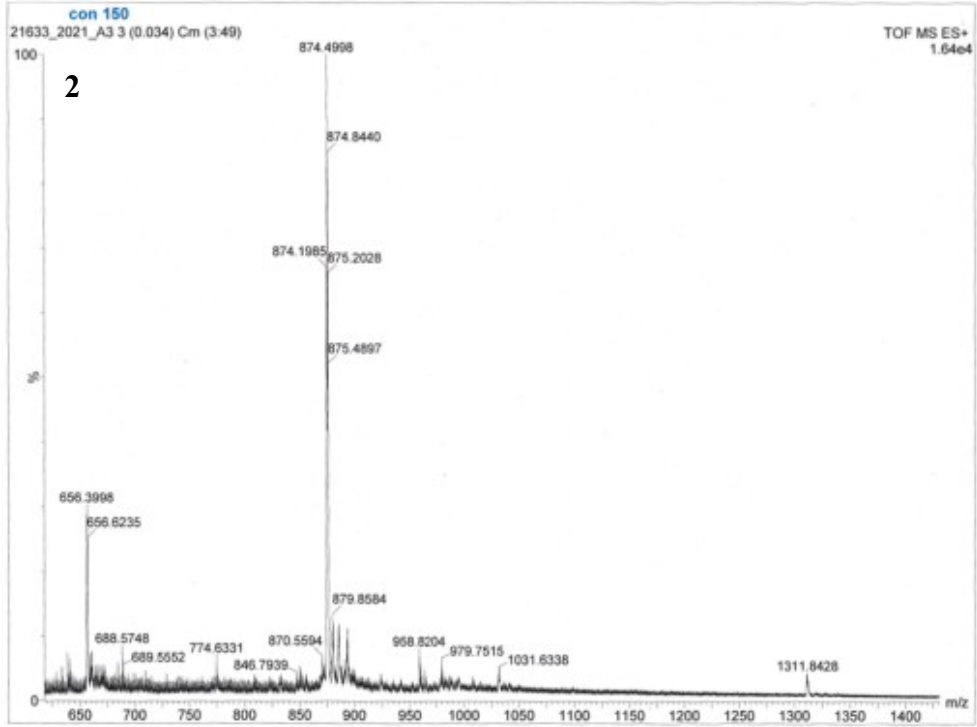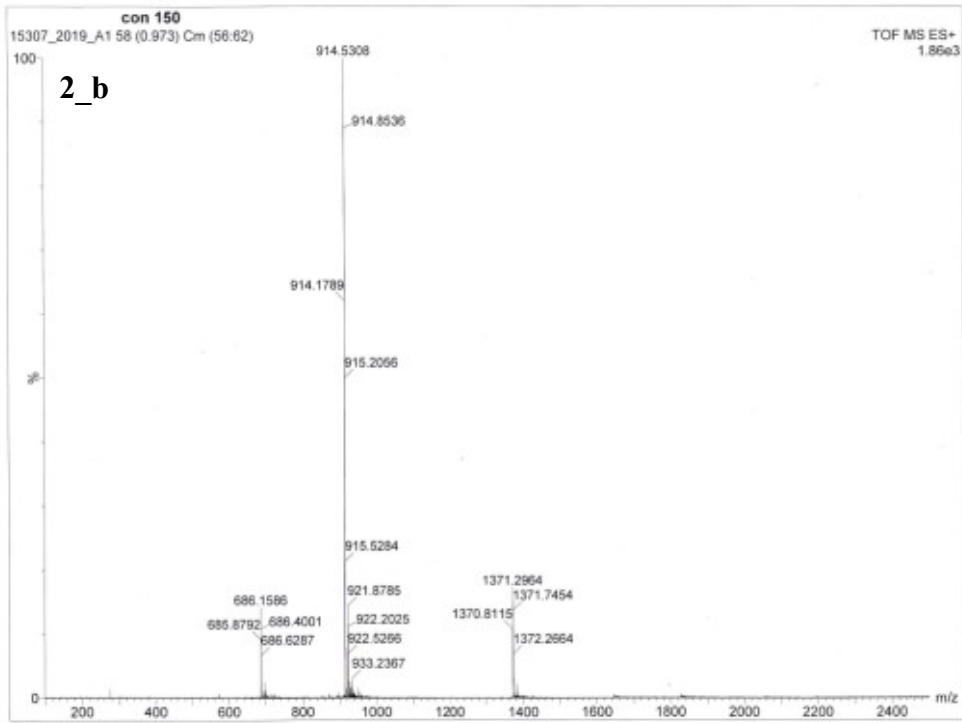

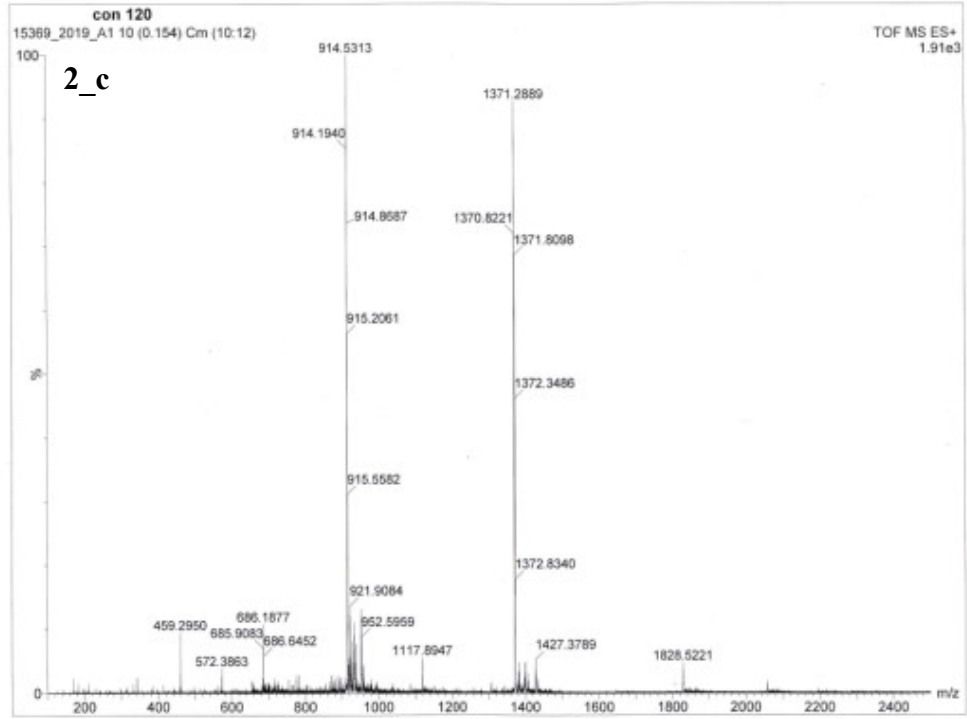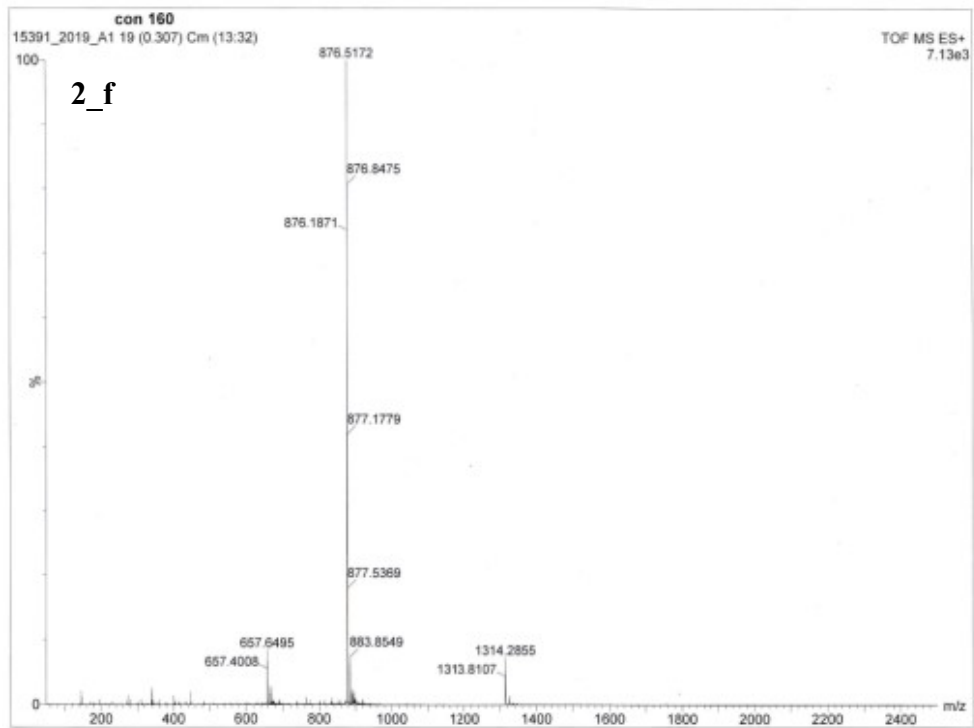

Fig. S2 Mass spectra of the studied peptides.

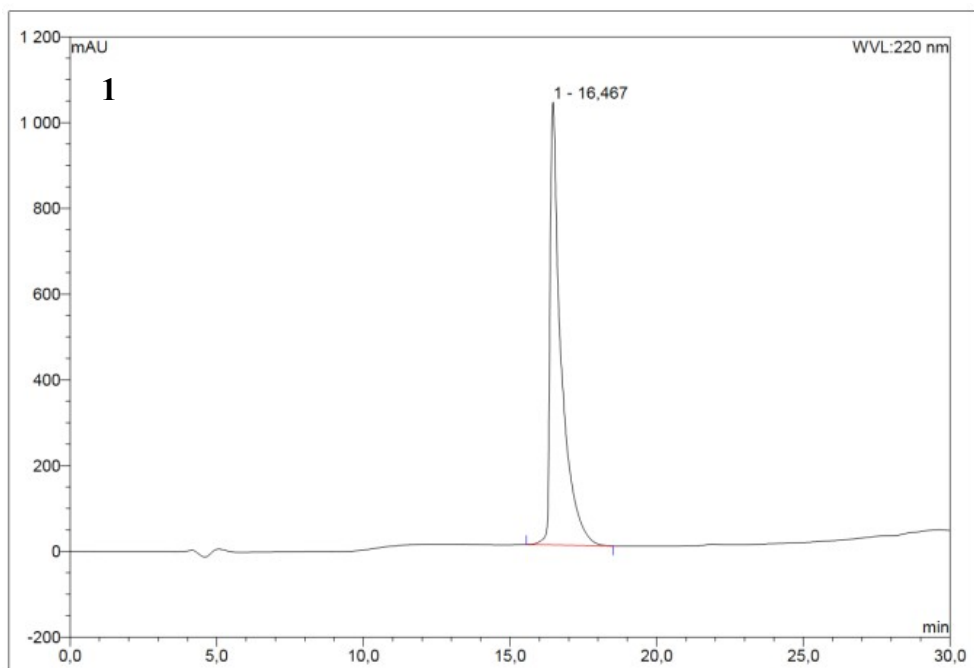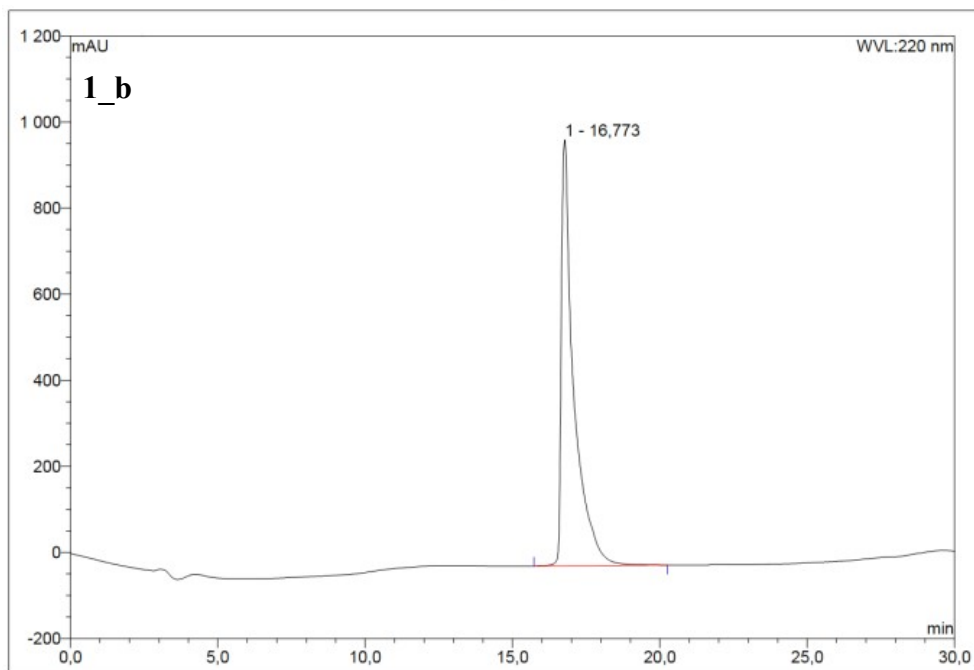

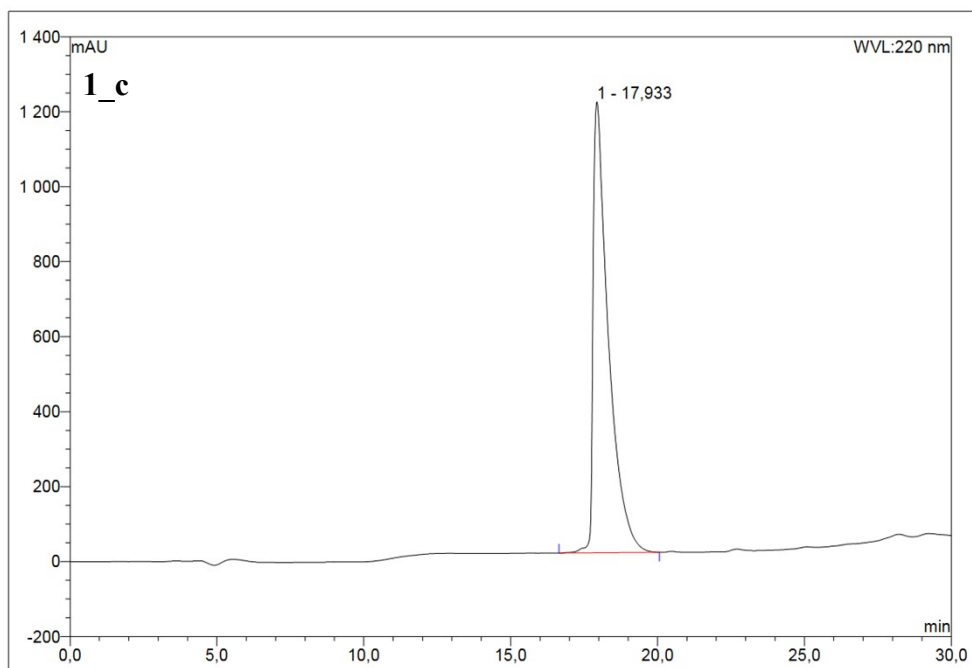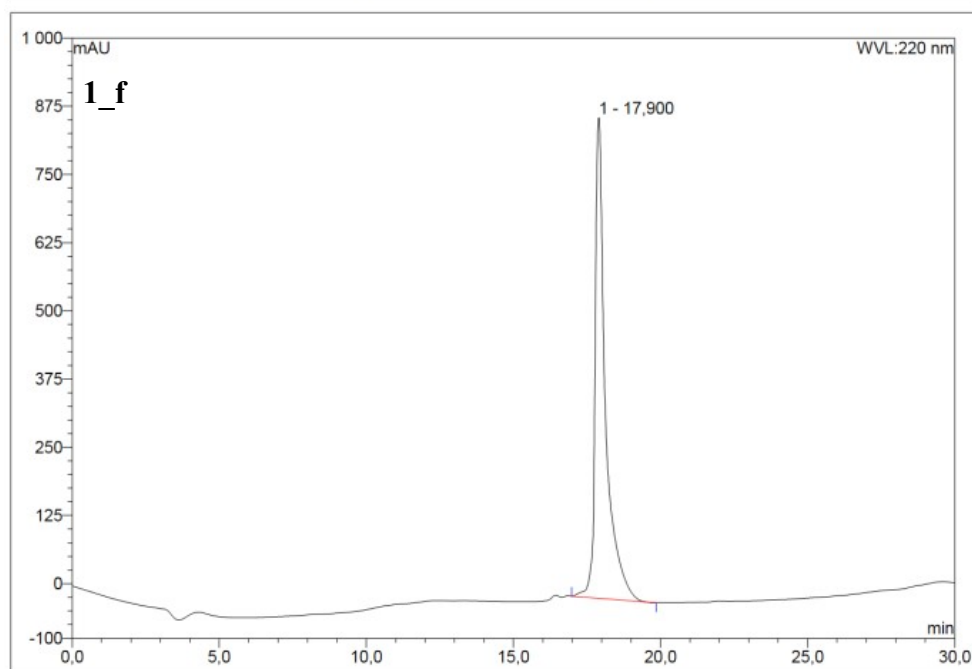



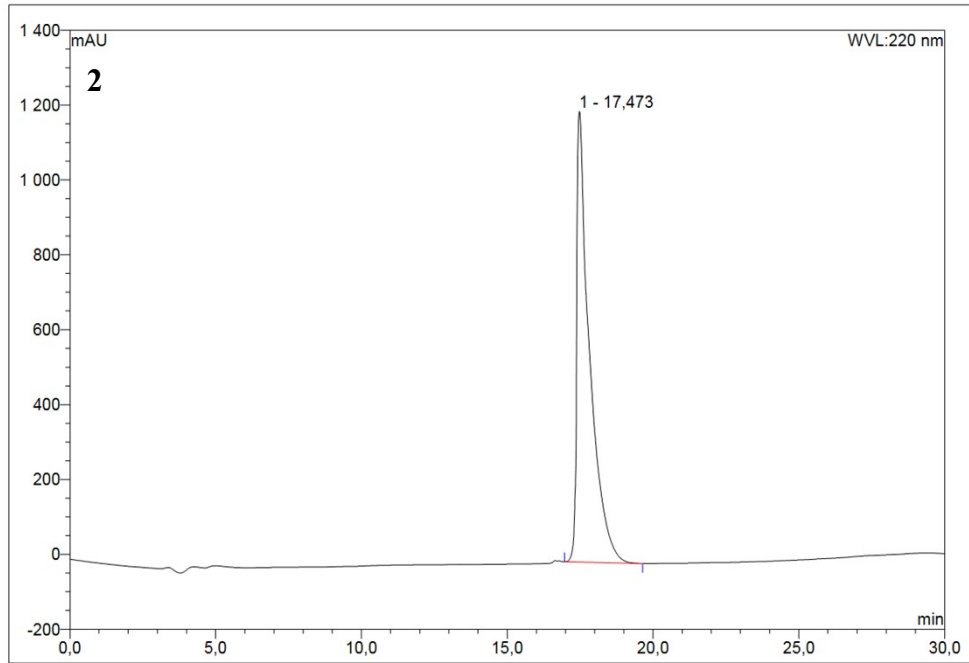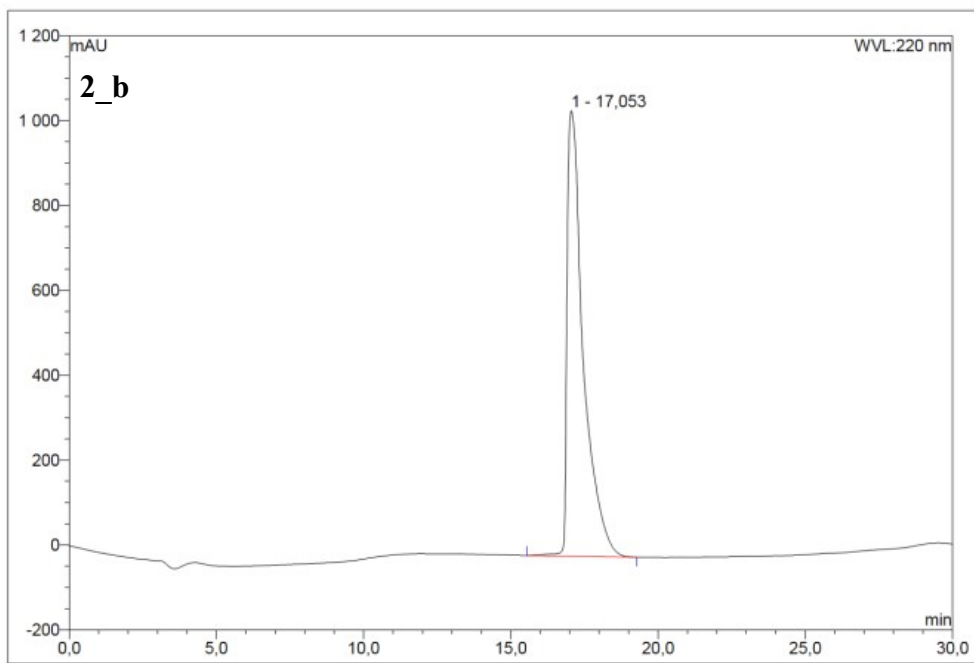

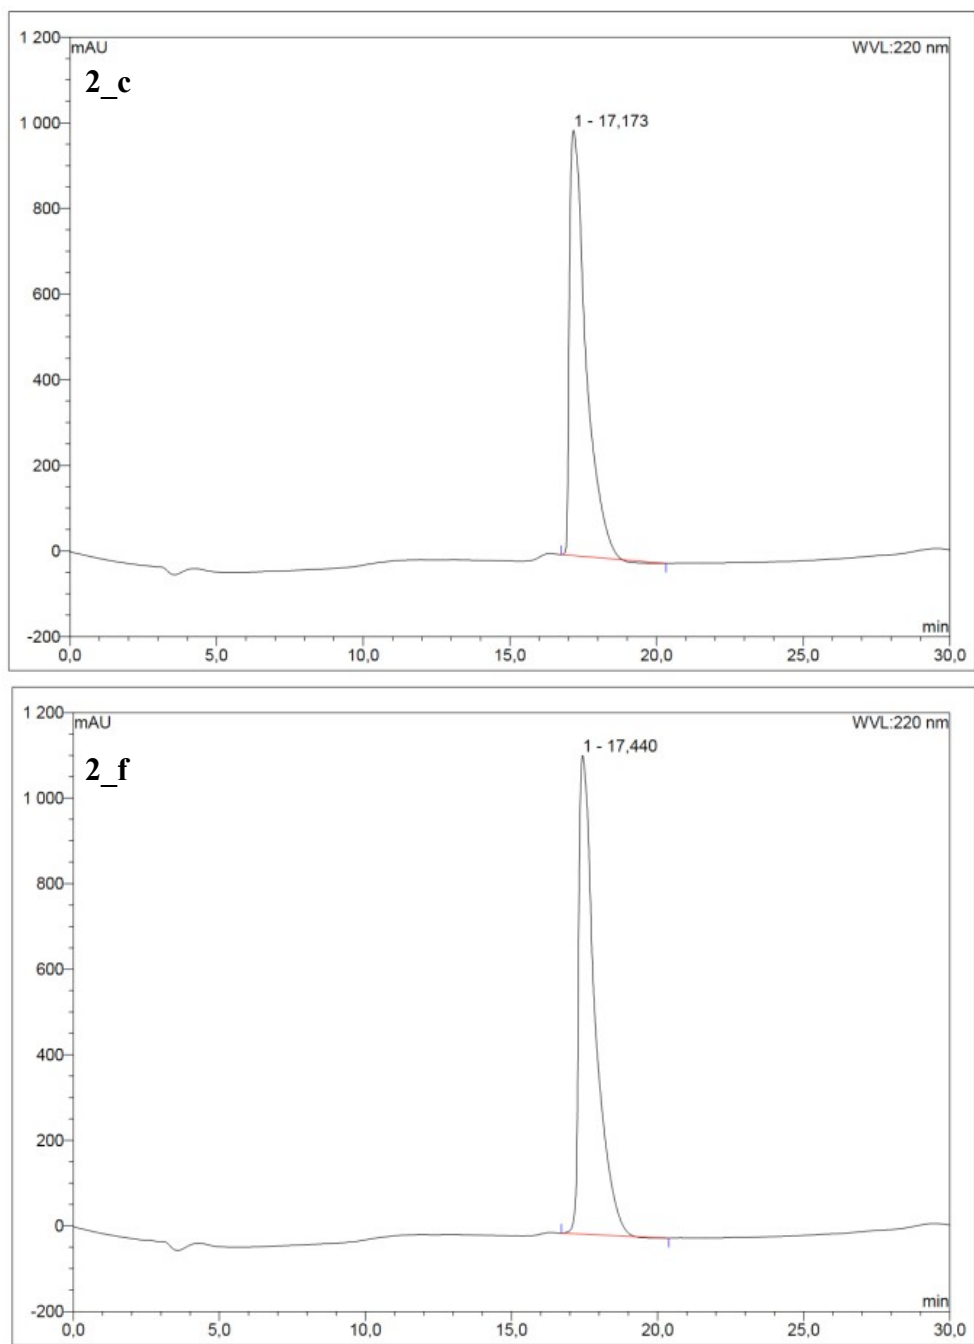

**Fig. S3** Analytical HPLC chromatograms of the studied peptides.

Mean residue ellipticity was calculated using the equation (S4):

$$\theta = \frac{M\theta_{MRE}}{10cln} \quad (\text{S4})$$

$\theta$  = mean residue ellipticity

$\theta_{MRE}$  = ellipticity

$c$  = concentration

$l$  = path length

$n$  = number of residues

$$[\theta] = [\text{deg} \times \text{cm}^2 \times \text{dmol}^{-1}]$$

**Eqn. S4.** Mean residue ellipticity calculation.

For each thermal denaturation experiment, the data were fit to a two-state folding model adapted and described by Kreitler *et al.* [I] using OriginPro 9.0. We used equation (S7):

$$\theta = \frac{1}{1 + e^{-\frac{\Delta H(1 - \frac{T}{T_m})}{RT}}} (b_f - b_u - m_u T + m_f T) + b_u + m_u T \quad (S7)$$

where:

$\theta$  = measured ellipticity

$b_f$  = y-intercept of folded baseline

$b_u$  = y-intercept of unfolded baseline

$m_f$  = slope of folded baseline

$m_u$  = slope of unfolded baseline

T = temperature

$T_m$  = melting temperature

$\Delta H$  = enthalpy of folding

R = ideal gas constant

**Eqn. S5.** The thermal denaturation experiment data fitting.

[I] D. F. Kreitler, *et al.* Effects of Single  $\alpha$ -to- $\beta$  Residue Replacements on Structure and Stability in a Small Protein: Insights from Quasiracemic Crystallization. *J. Am. Chem. Soc.* **2016**, *138*, 6498–6505.

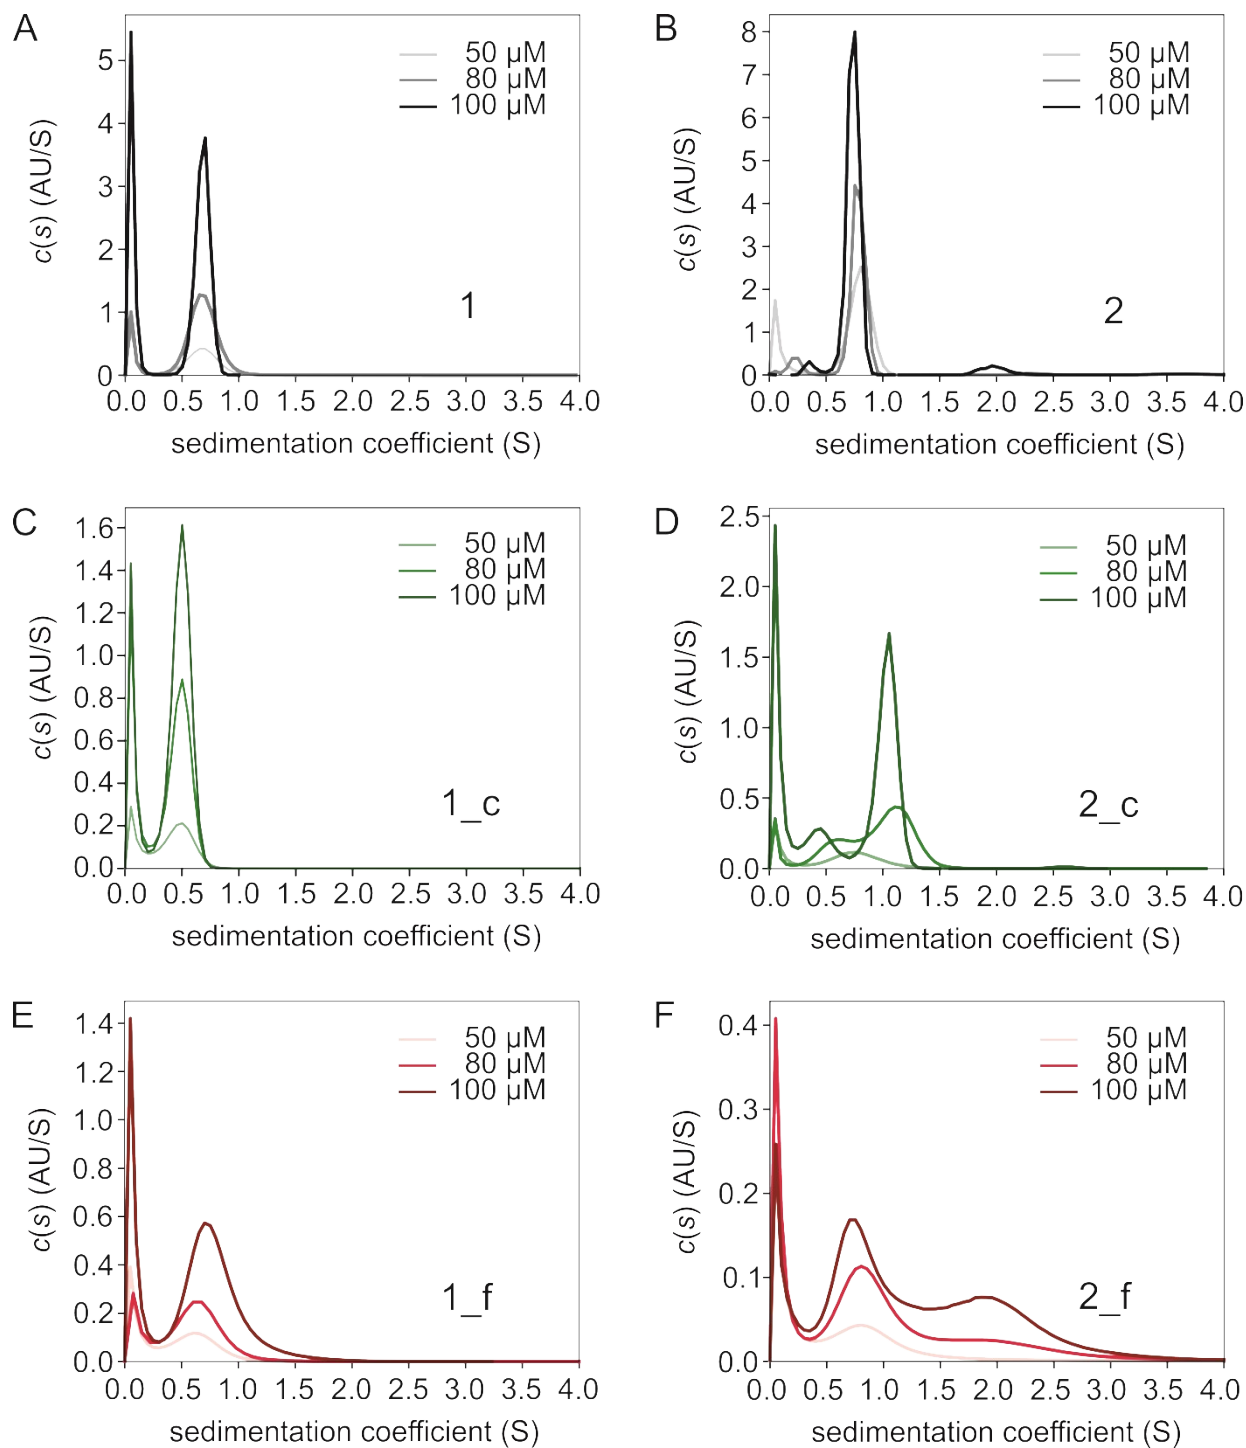

**Fig. S6** Sedimentation coefficient distributions  $c(s)$  obtained for different concentrations of the studied peptides resuspended in water. Centrifugation was performed at 50 000 rpm and 20 °C.

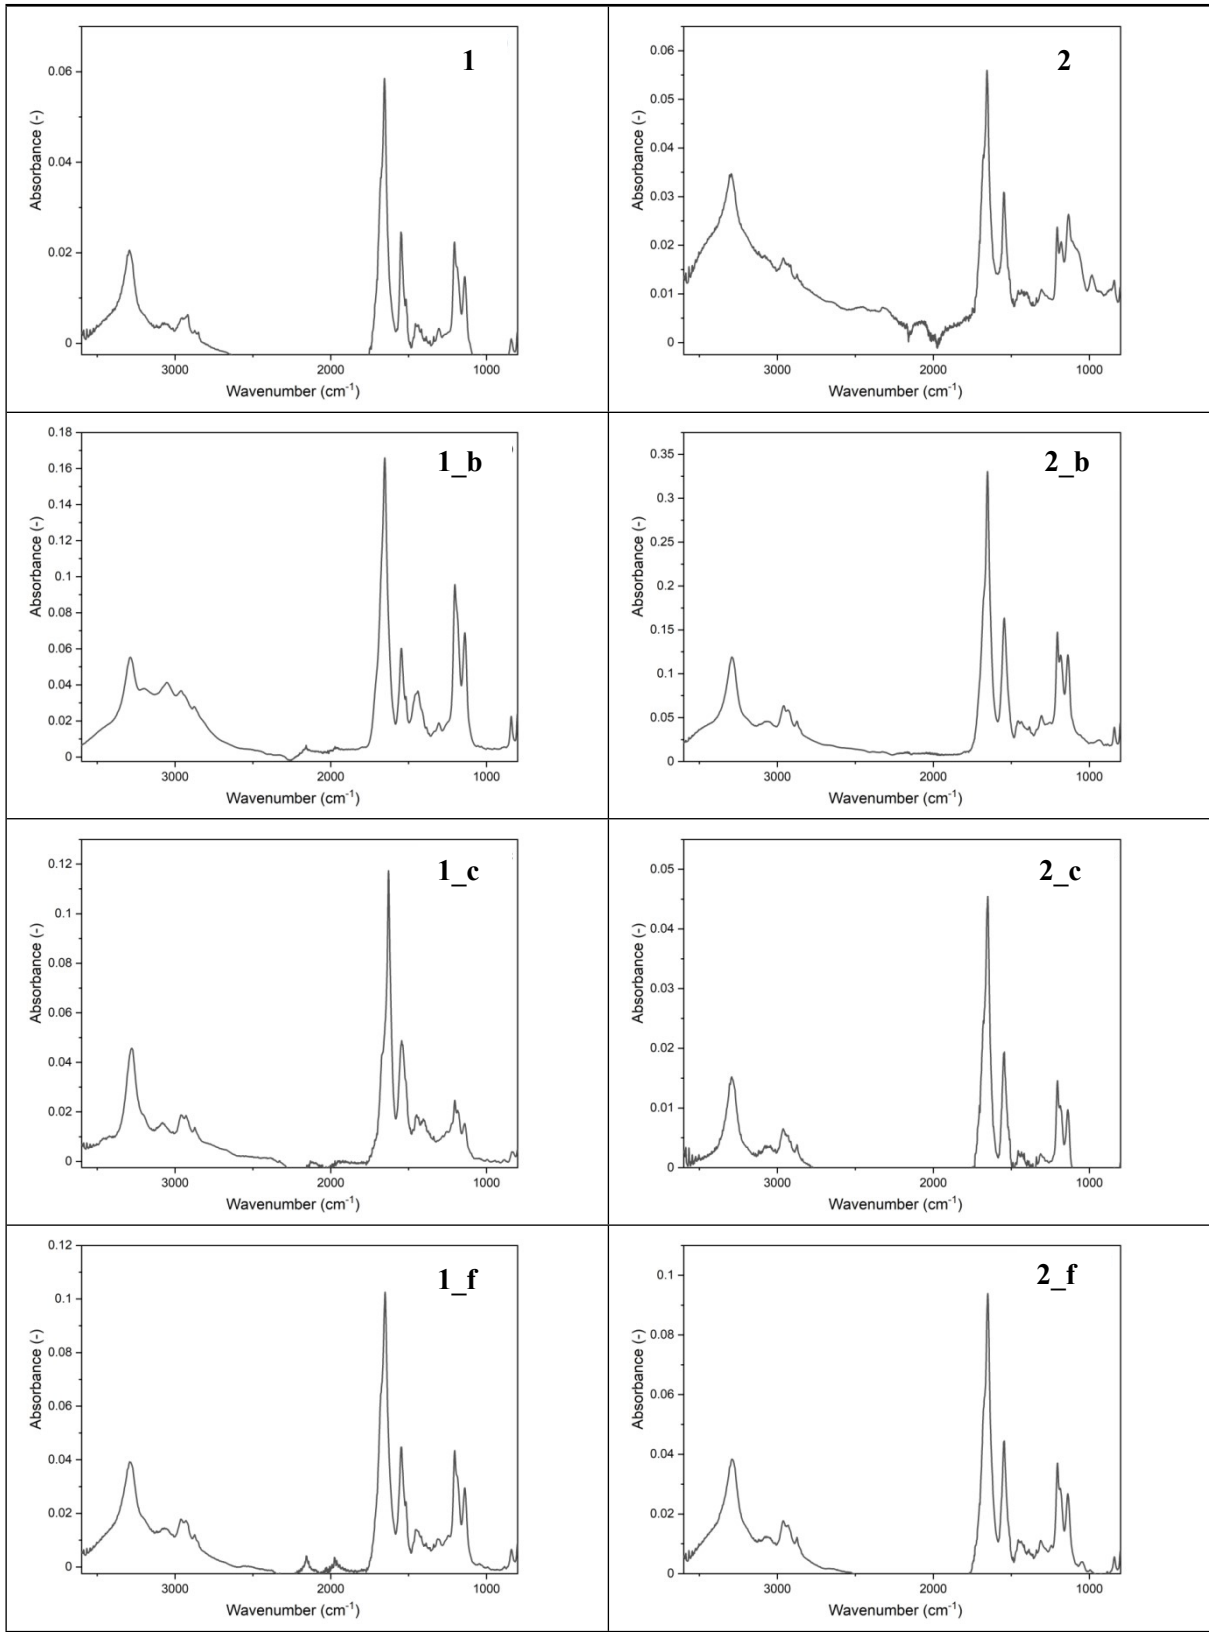

**Fig. S7** Raw ATR-FTIR spectra of the studied peptides in the range of 3600-800  $\text{cm}^{-1}$  on the day of dissolving.  $C_{\text{pep}} = 320 \mu\text{M}$ .

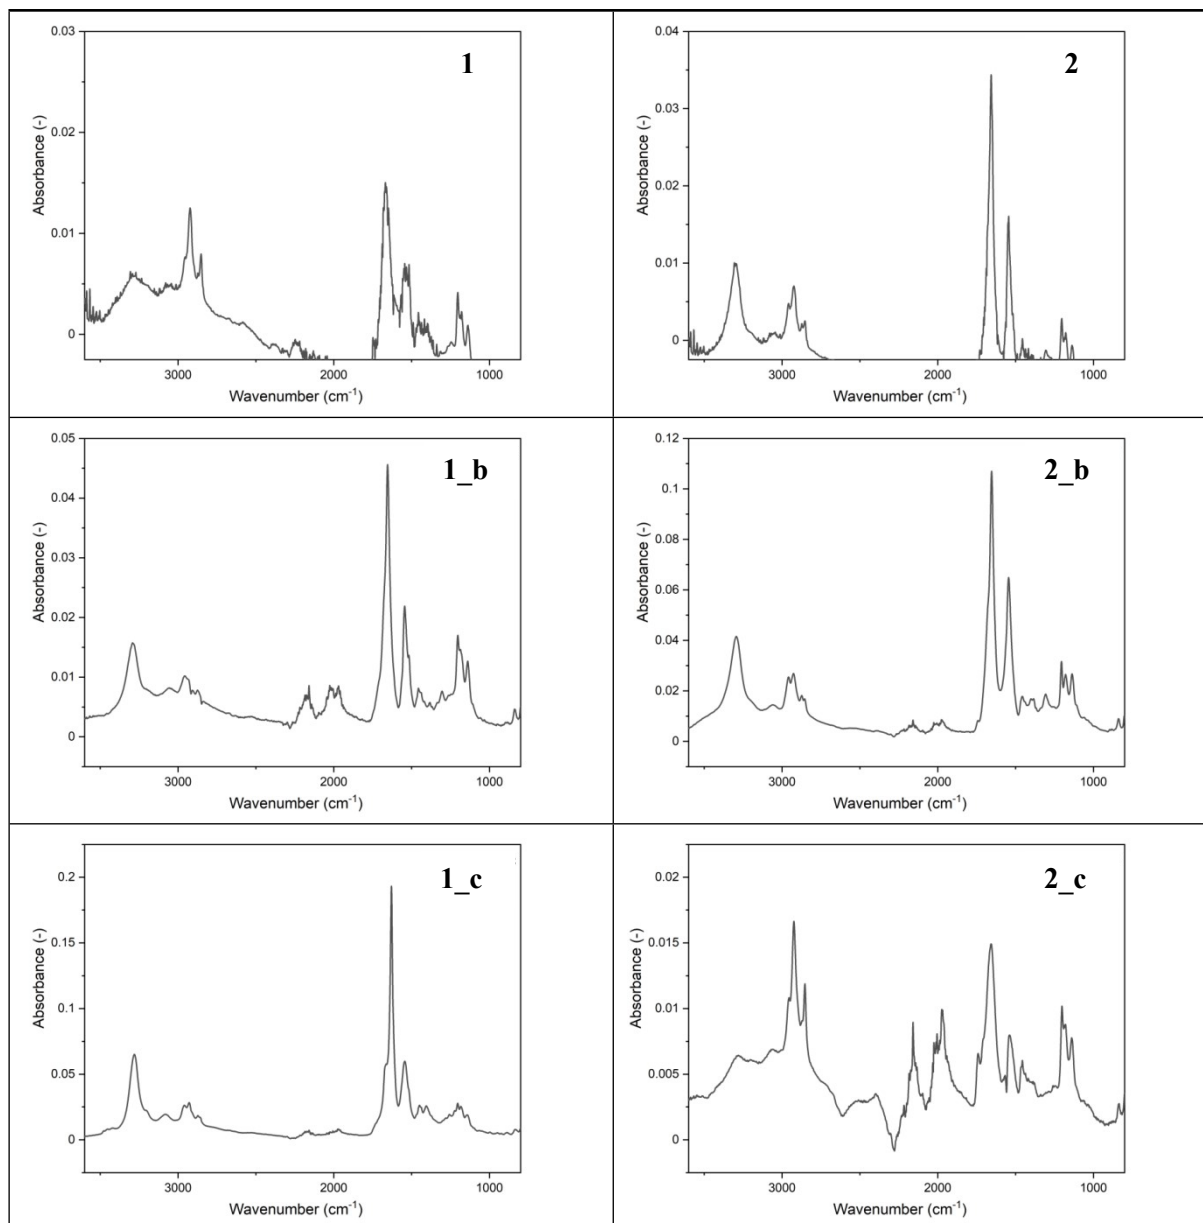

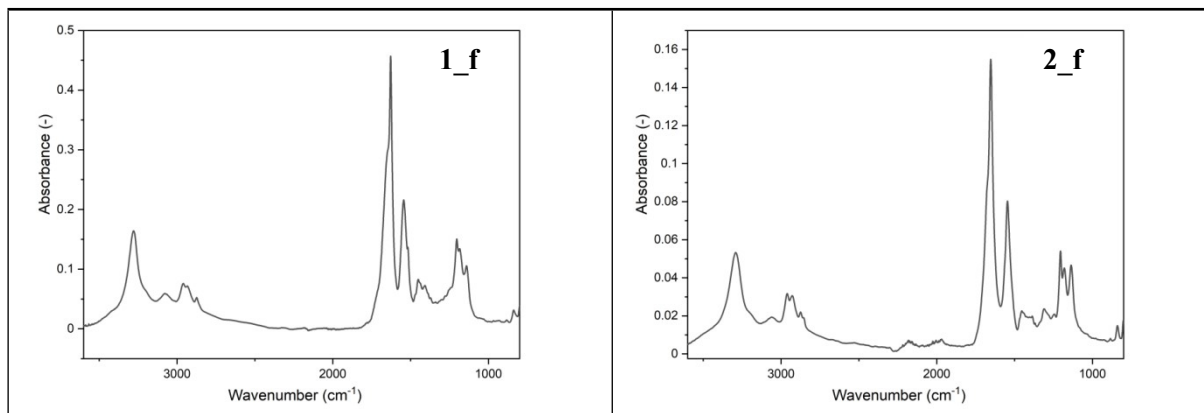

**Fig. S8** Raw ATR-FTIR spectra of the studied peptides in the range of 3600-800  $\text{cm}^{-1}$  after 30 days of incubation at 37 °C.  $C_{\text{pep}} = 320 \mu\text{M}$ .

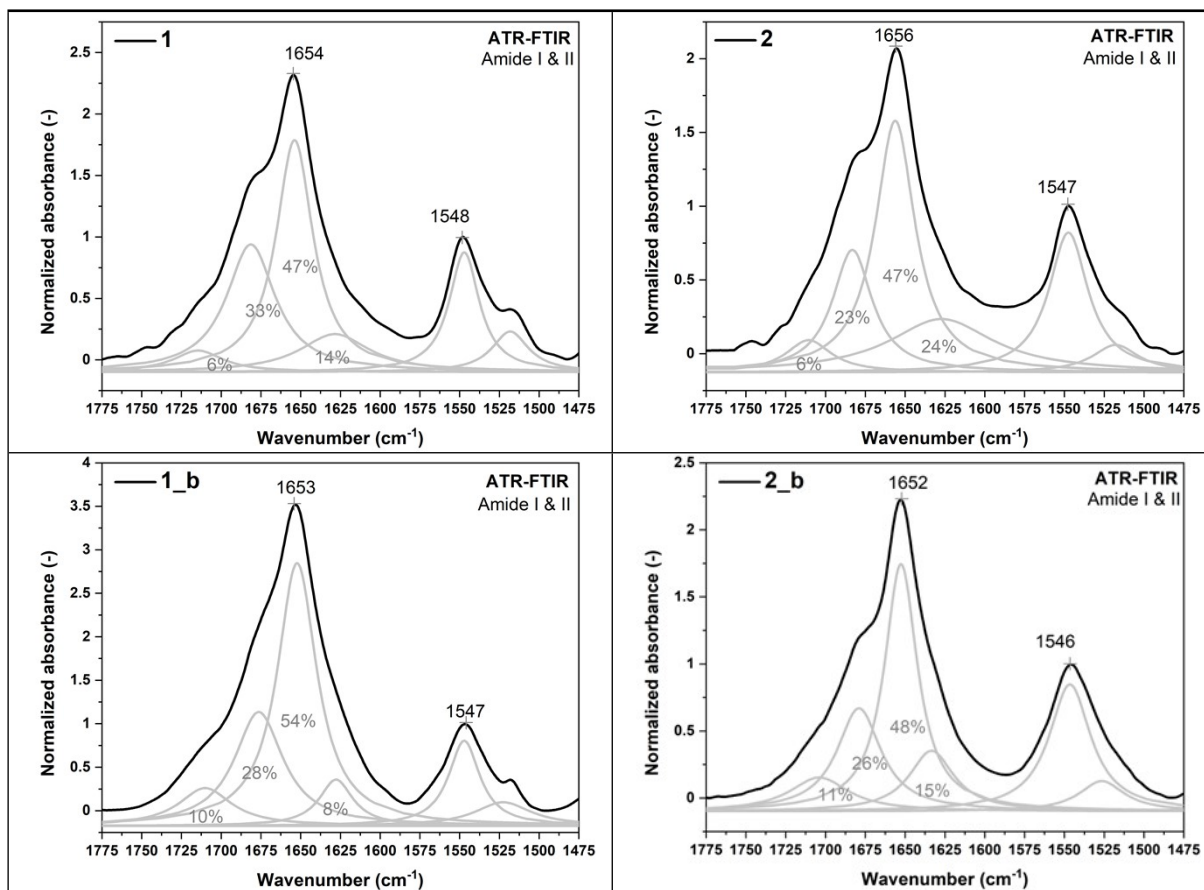



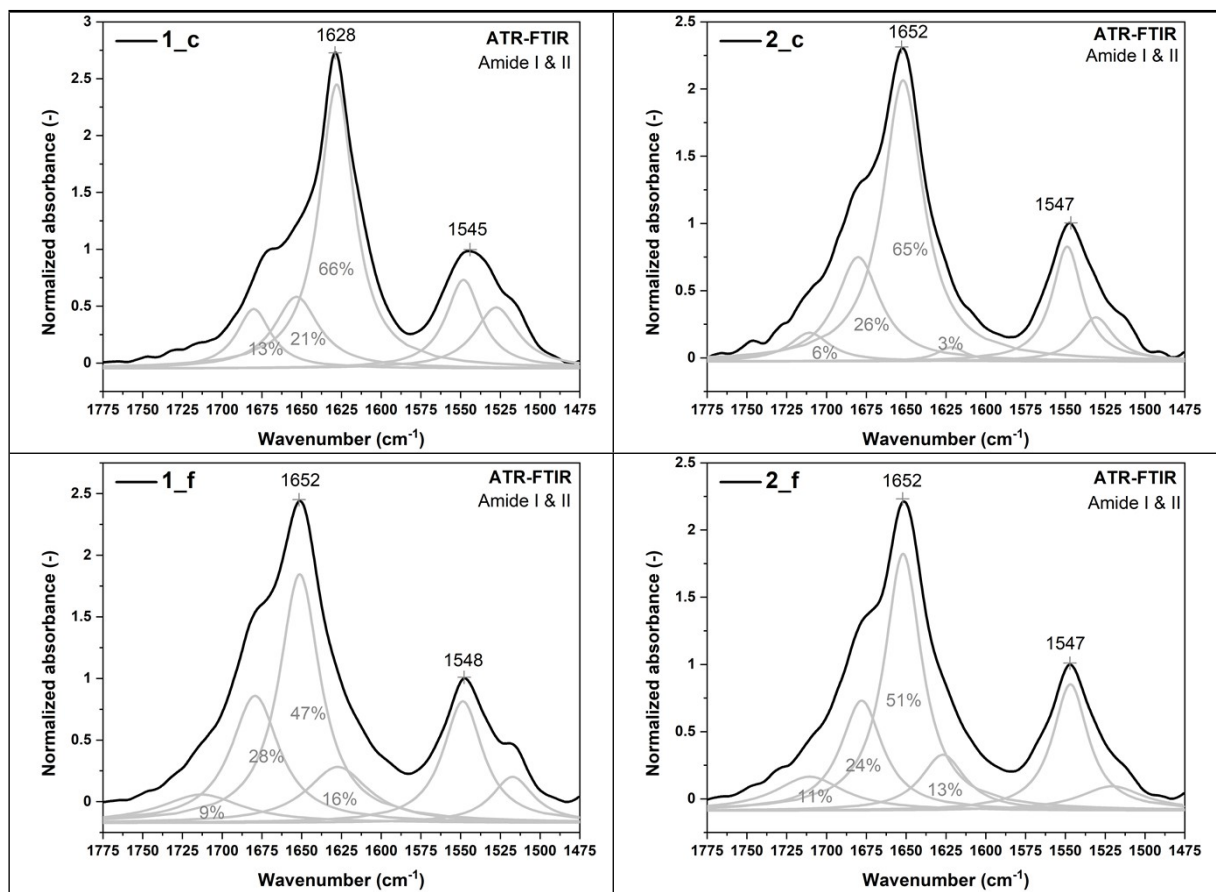

**Fig. S9** Normalized ATR-FTIR spectra of air-dried films of studied peptides registered on the day of dissolving, with sub-bands obtained from the curve fitting procedure in the amide bands region (1775-1475 cm<sup>-1</sup>).  $C_{\text{pep}} = 320 \mu\text{M}$ .

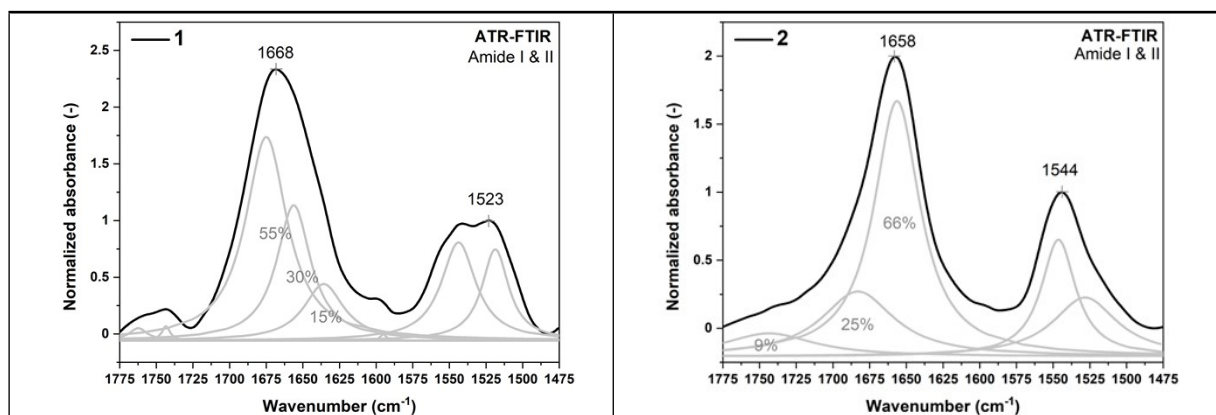

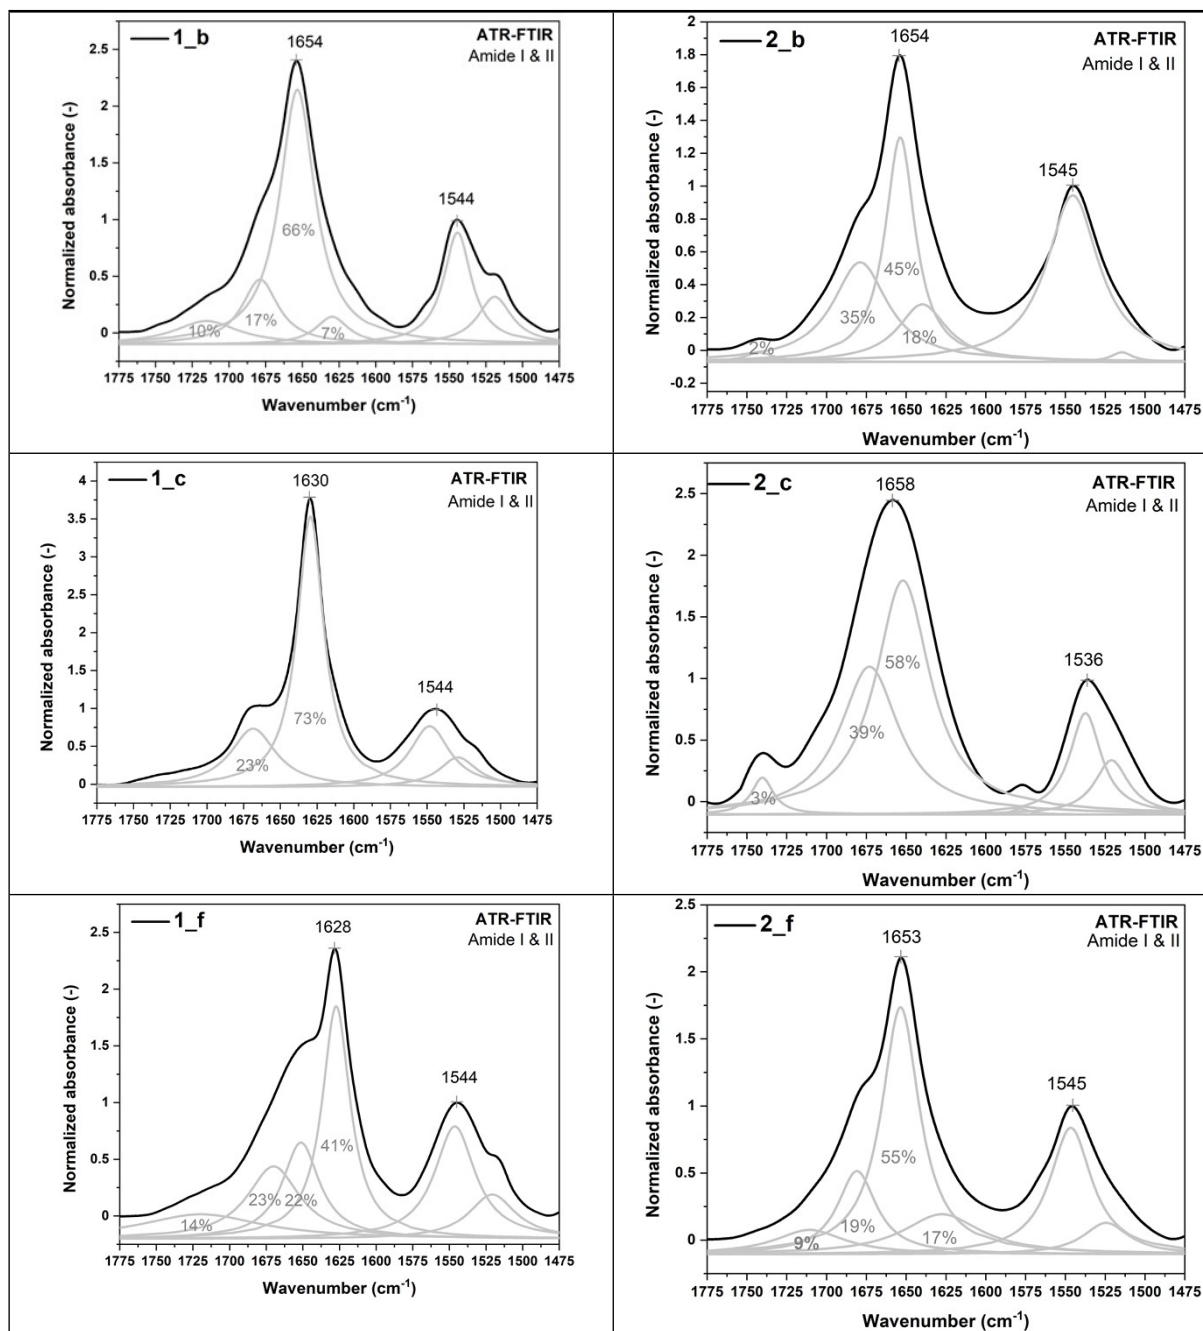

**Fig. S10** Normalized ATR-FTIR spectra of air-dried films of studied peptides registered after 30 days of incubation at 37 °C, with sub-bands obtained from the curve fitting procedure in the amide bands region (1775-1475 cm<sup>-1</sup>). C<sub>pep</sub> = 320 μM.

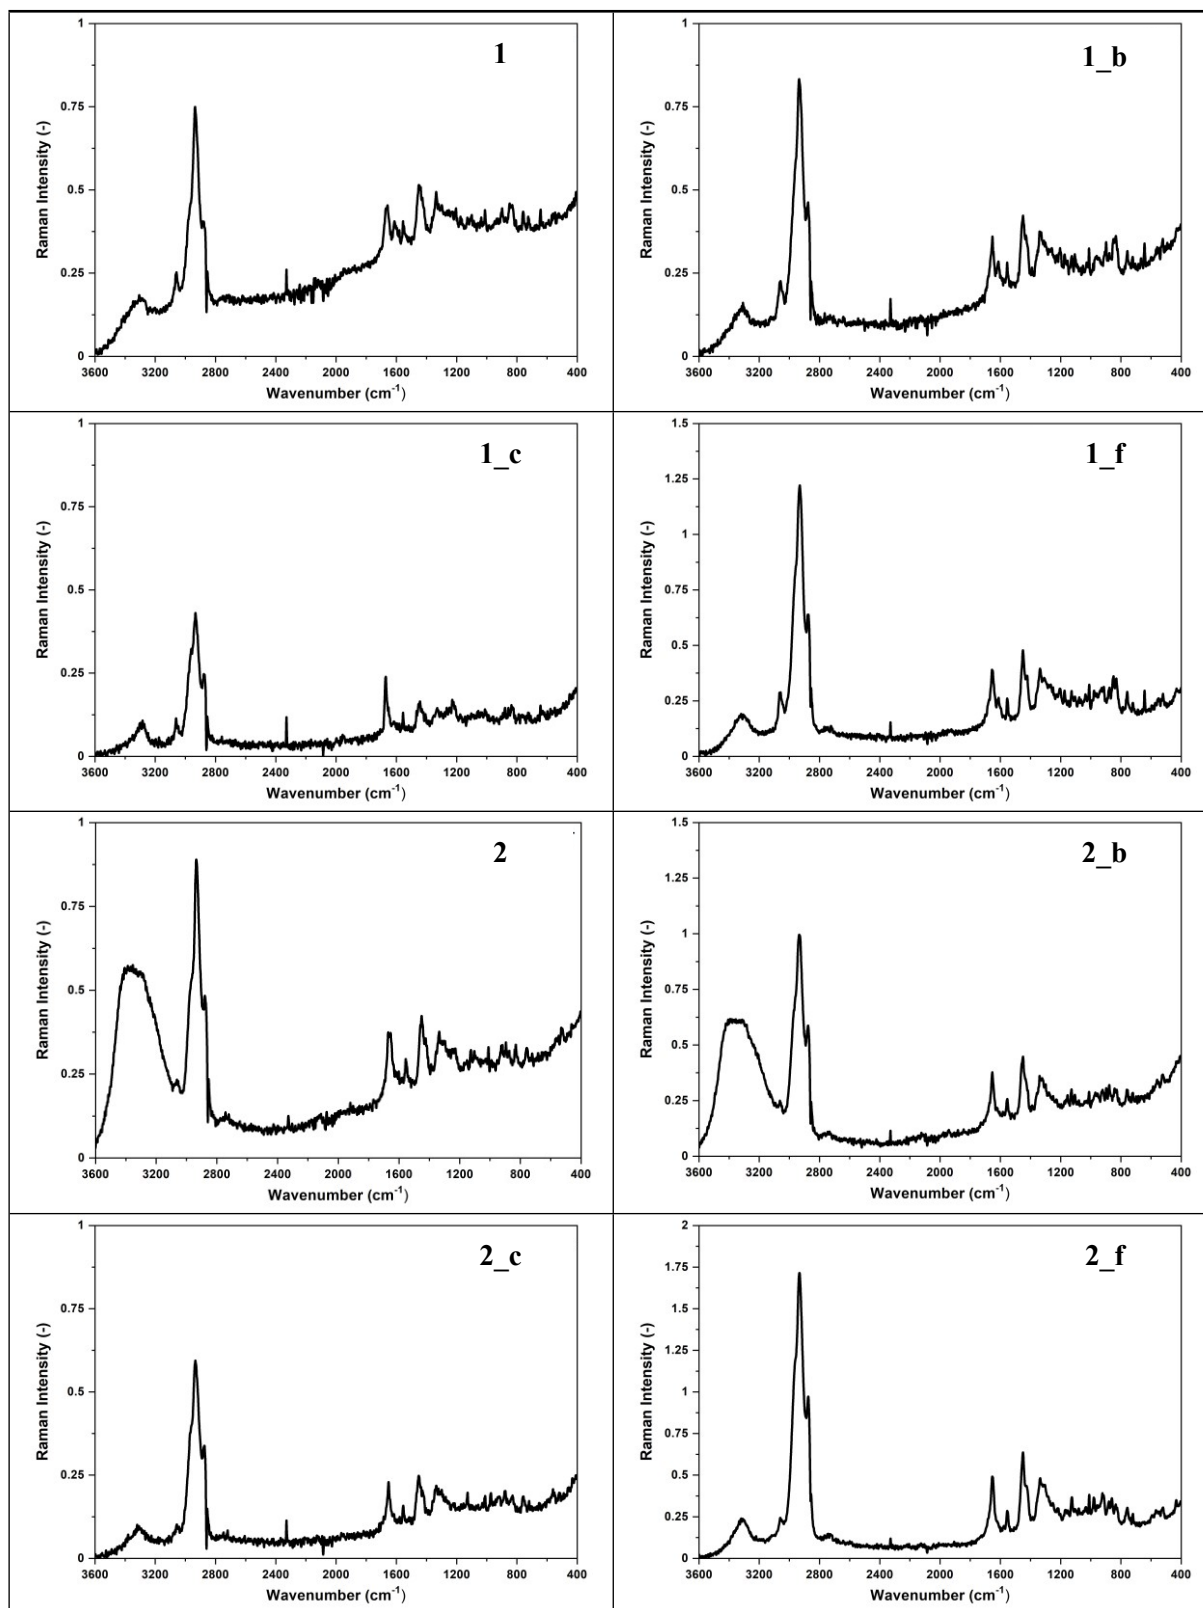

**Fig. S11** Raw FT-Raman spectra of the studied peptides in the range of 3600-400 cm<sup>-1</sup>.  $C_{\text{pep}} = 320 \mu\text{M}$ .

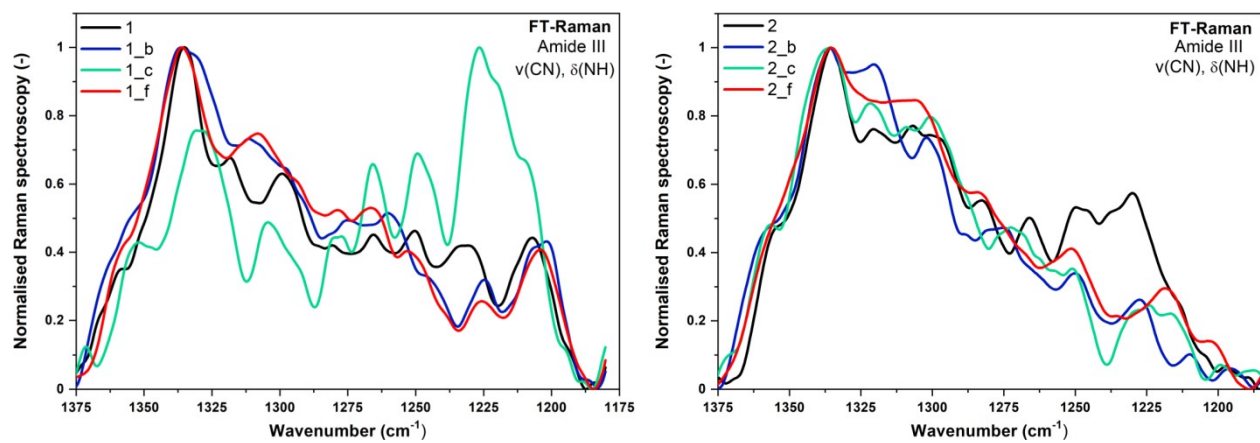

**Fig. S12** Normalized FT-Raman spectra of the studied peptides smoothed with SG 35 (see Methods), in the wavenumber range of 1375–1175  $\text{cm}^{-1}$  (Amide III).  $C_{\text{pep}} = 320 \mu\text{M}$ .

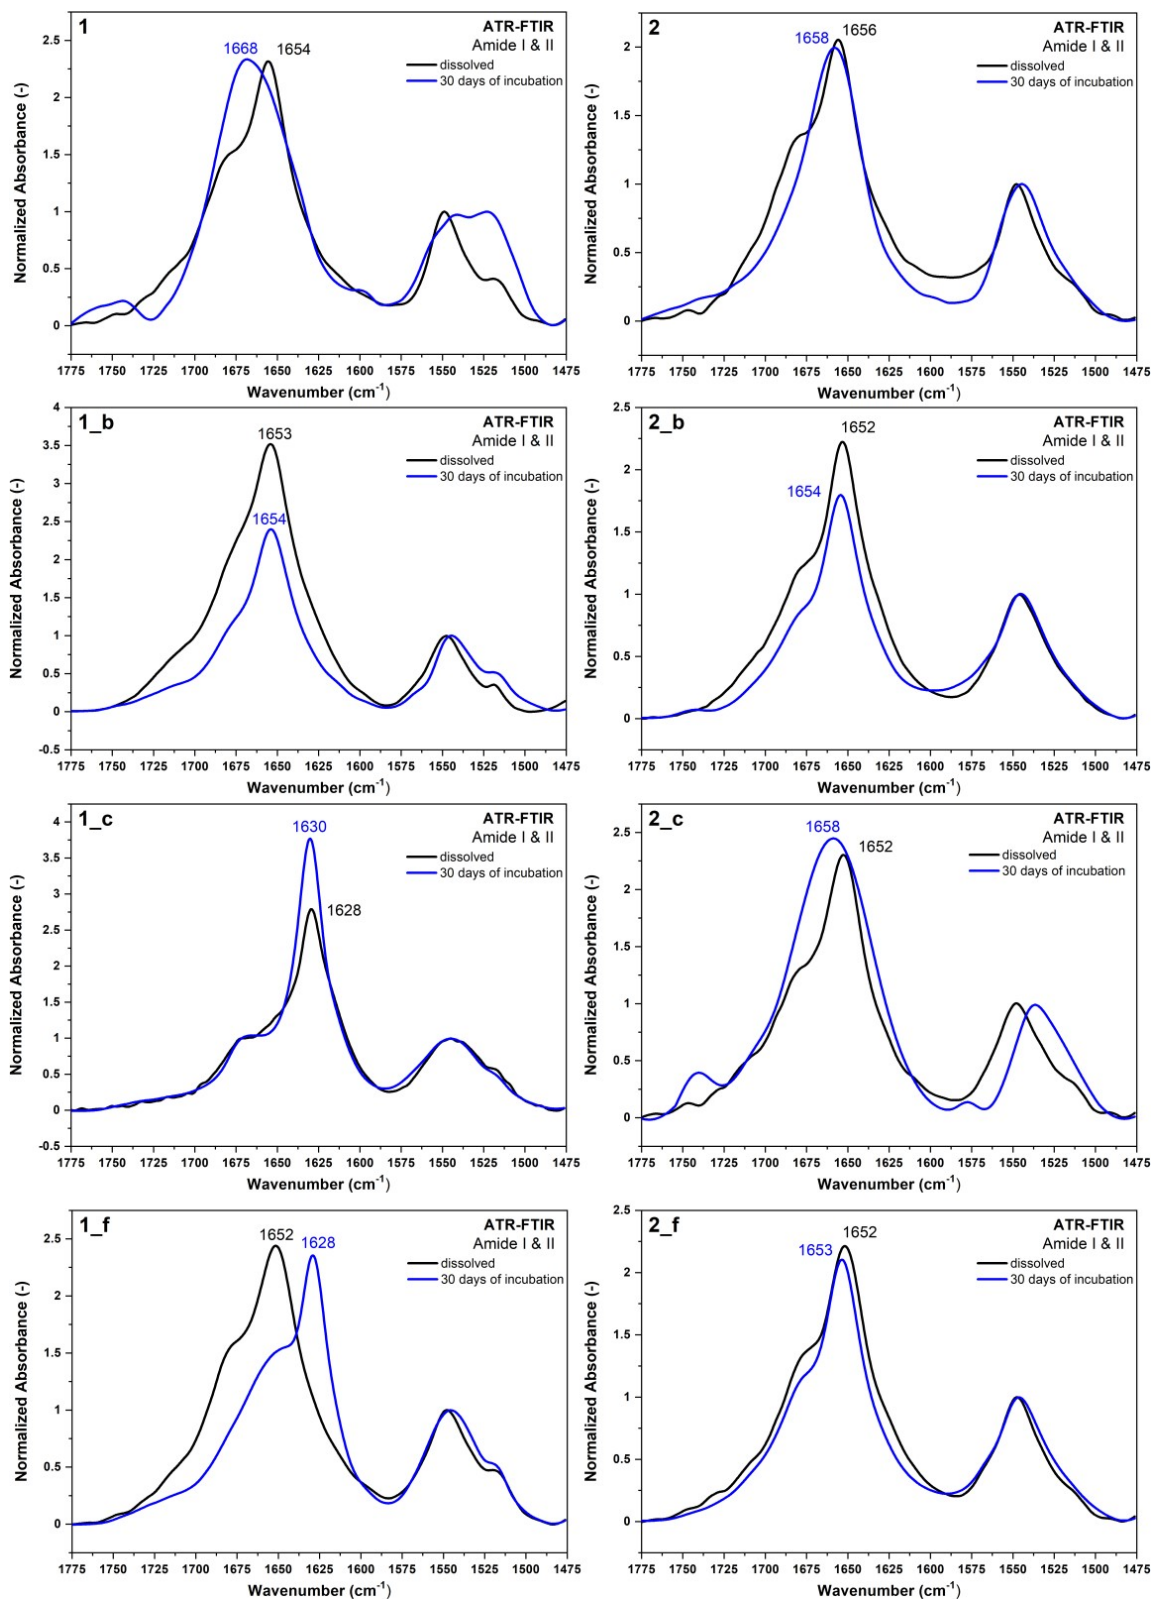

**Fig. S13** The comparison of the normalized ATR-FTIR spectra after dissolving and after 30 days of incubation.  $C_{\text{pep}} = 320 \mu\text{M}$ .

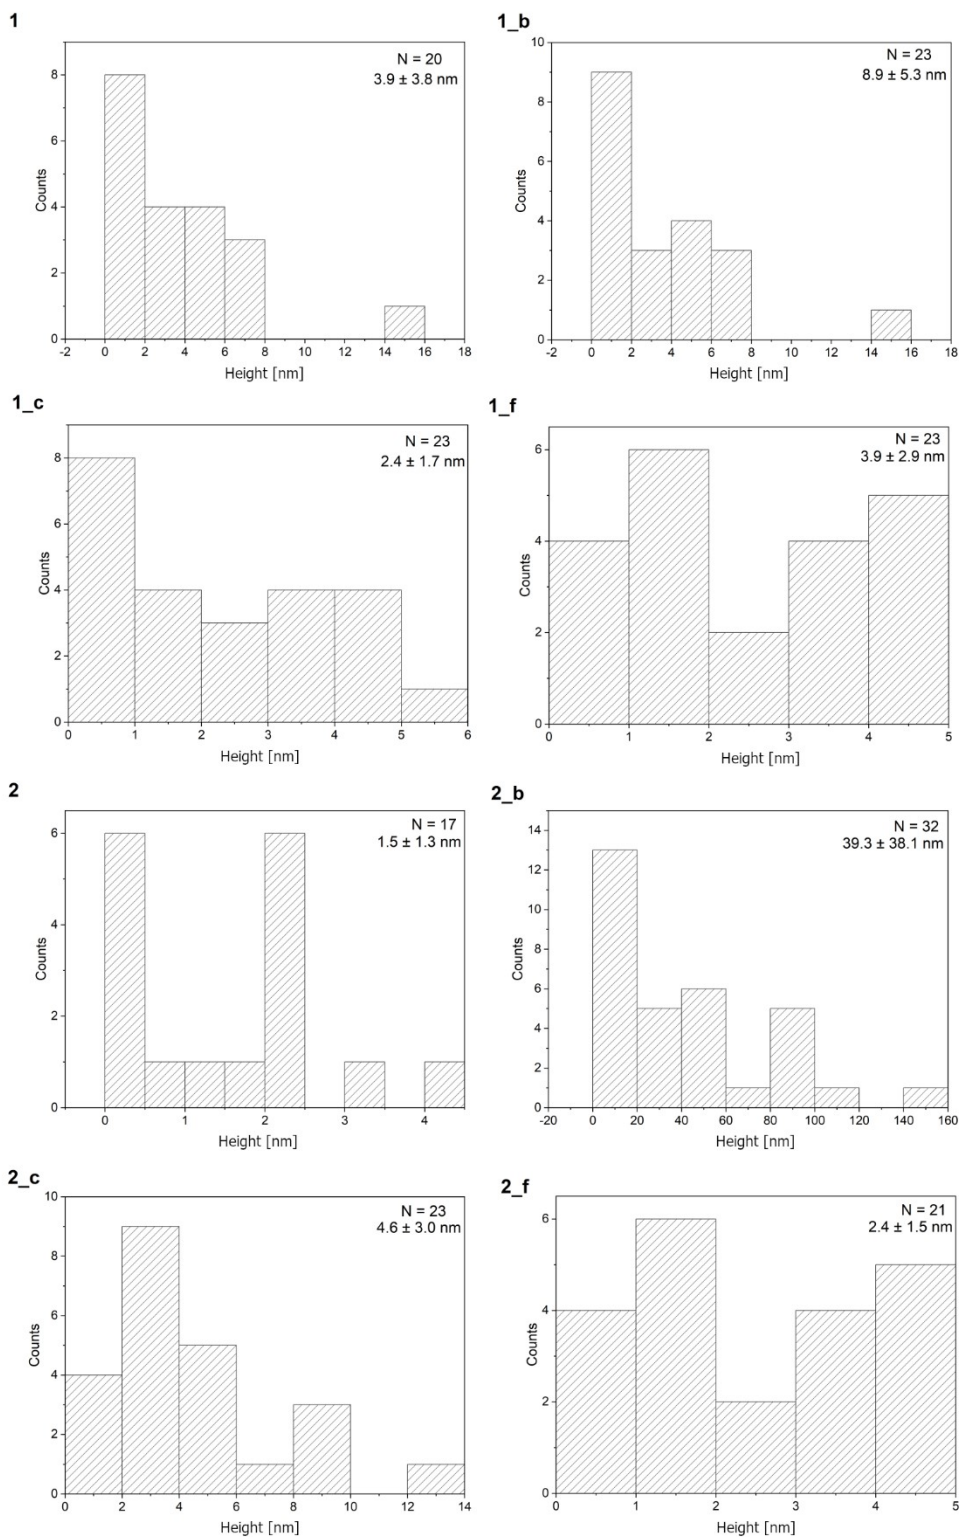

**Fig. S14** Frequency distributions of the peptides height observed by AFM.



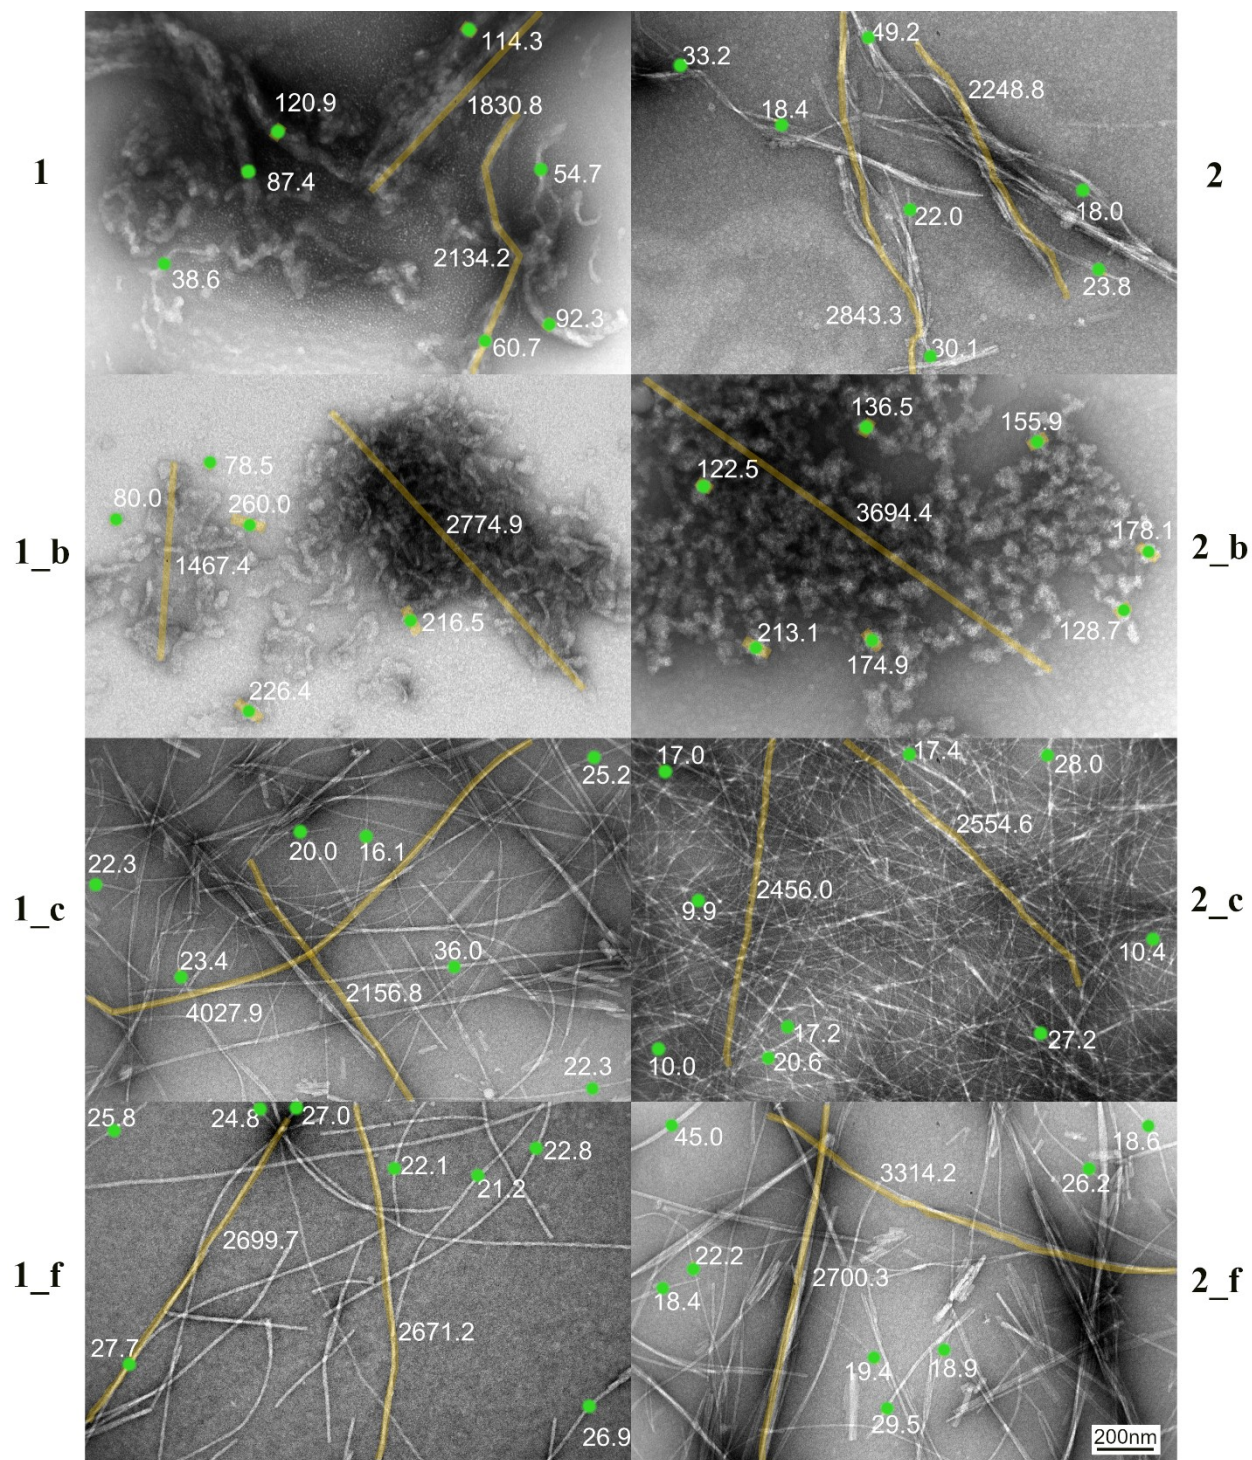

**Fig. S15** Electron micrographs with size measurements (in nm) of the obtained nanostructures after 30 days of incubation at 37 °C (magnification of 20 000). The yellow marks correspond to the length dimension, whereas the green dots indicate specific points for measuring the diameter.  $C_{\text{pep.}} = 160 \mu\text{M}$ .



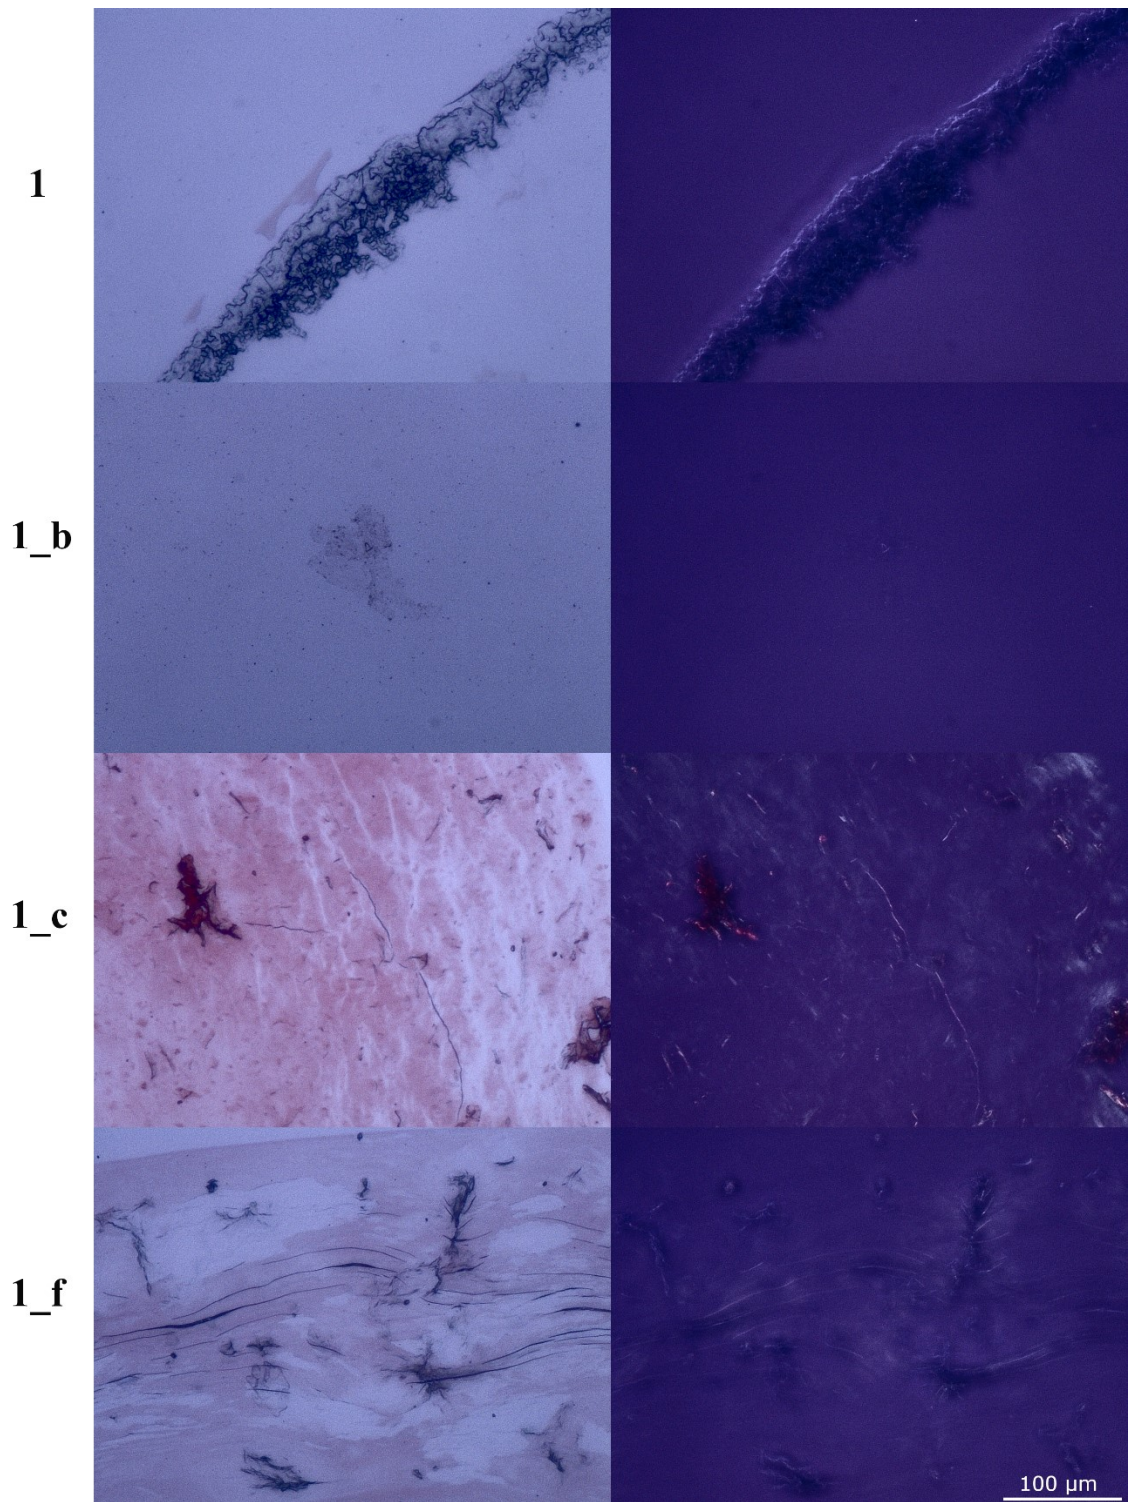



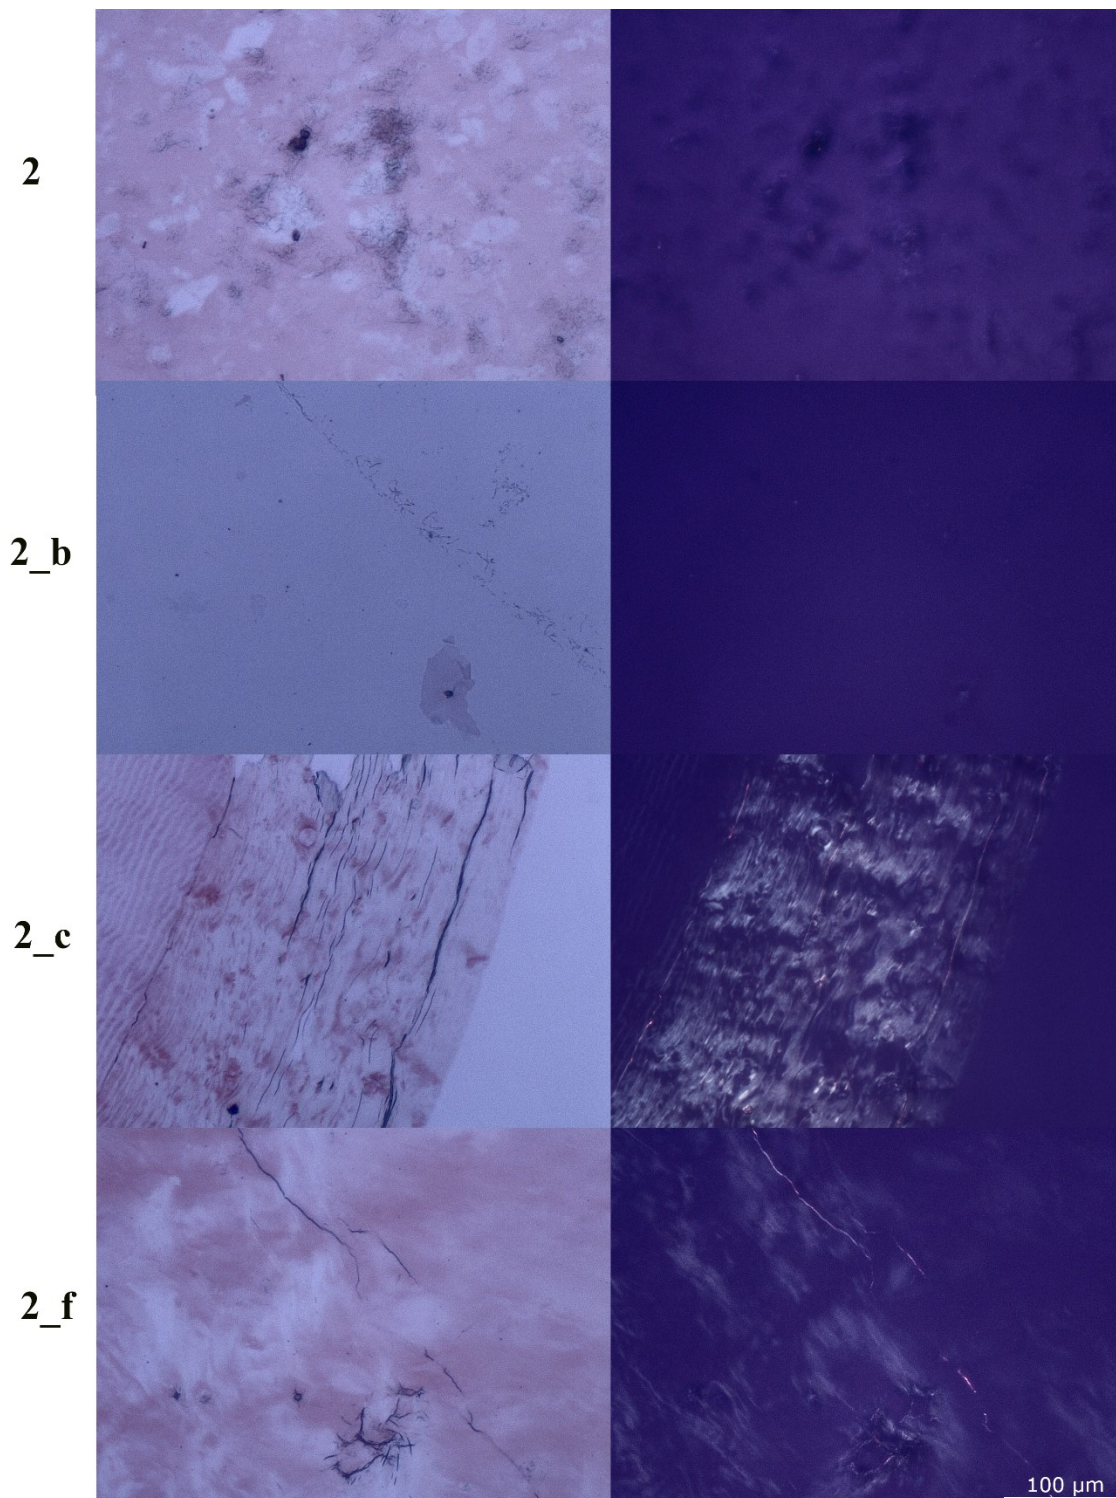

**Fig. S16** The studied peptides stained with Congo red and examined under crossed polarized light (see right column). The original magnification x200.

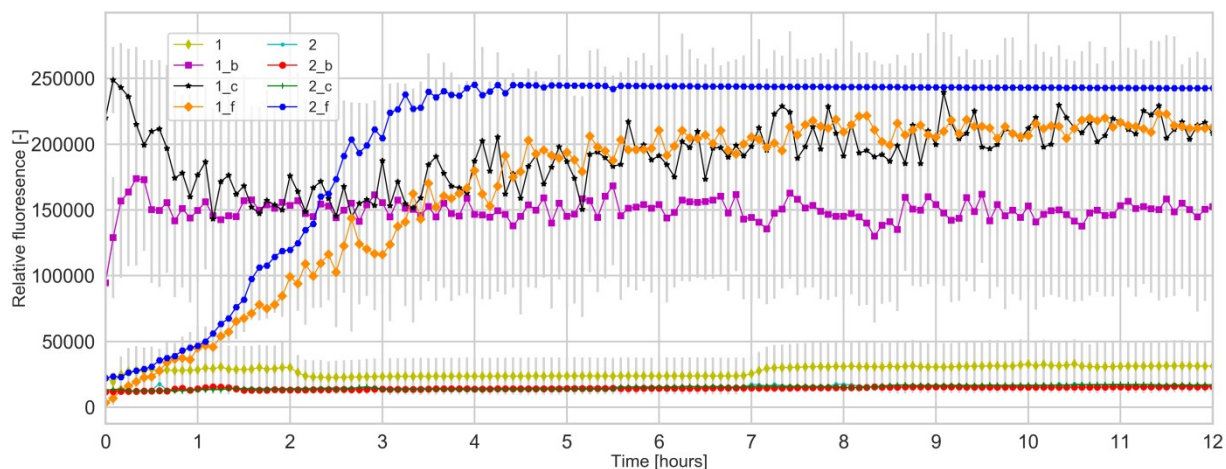

**Fig. S17** Results of ThT fluorescence kinetic assay registered for the studied peptides.

**Table S18** The mean values of relative fluorescence in the time range of 5 to 12 hours calculated for the studied peptides.

| Sample     | Relative fluorescence $\pm$ standard deviation [-] |
|------------|----------------------------------------------------|
| <b>1</b>   | 29 018.83 $\pm$ 17342.14                           |
| <b>1_b</b> | 149 775.52 $\pm$ 62436.88                          |
| <b>1_c</b> | 203 530.07 $\pm$ 62893.68                          |
| <b>1_f</b> | 208 124.59 $\pm$ 51289.37                          |
| <b>2</b>   | 16 068.33 $\pm$ 1606.03                            |
| <b>2_b</b> | 15 086.78 $\pm$ 844.59                             |
| <b>2_c</b> | 16 152.38 $\pm$ 4755.09                            |
| <b>2_f</b> | 243 411.35 $\pm$ 66.13                             |
